# Supplementary material for: Global analysis of shared T cell specificities in human non-small cell lung cancer enables HLA inference and antigen discovery
Source: PubMed Central journal article supplement — Immunity. 2021 Mar 9;54(3):586–602.e8. doi: 10.1016/j.immuni.2021.02.014 (PMC7960510; doi:10.1016/j.immuni.2021.02.014), 2021-03-09
Supplement: mmc1.pdf [file mmc1.pdf]

## Supplemental information

### Global analysis of shared T cell specificities in human non-small cell lung cancer enables HLA inference and antigen discovery

Shin-Heng Chiou, Diane Tseng, Alexandre Reuben, Vamsee Mallajosyula, Irene S. Molina, Stephanie Conley, Julie Wilhelmy, Alana M. McSween, Xinbo Yang, Daisuke Nishimiya, Rahul Sinha, Barzin Y. Nabet, Chunlin Wang, Joseph B. Shrager, Mark F. Berry, Leah Backhus, Natalie S. Lui, Heather A. Wakelee, Joel W. Neal, Sukhmani K. Padda, Gerald J. Berry, Alberto Delaidelli, Poul H. Sorensen, Elena Sotillo, Patrick Tran, Jalen A. Benson, Rebecca Richards, Louai Labanieh, Dorota D. Klysz, David M. Louis, Steven A. Feldman, Maximilian Diehn, Irving L. Weissman, Jianjun Zhang, Ignacio I. Wistuba, P. Andrew Futreal, John V. Heymach, K. Christopher Garcia, Crystal L. Mackall, and Mark M. Davis

# Figure S1

## A

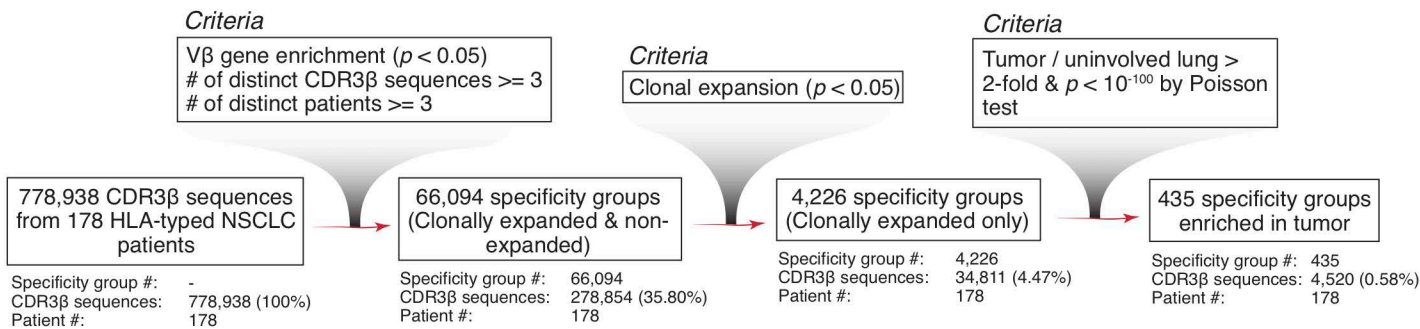

## B

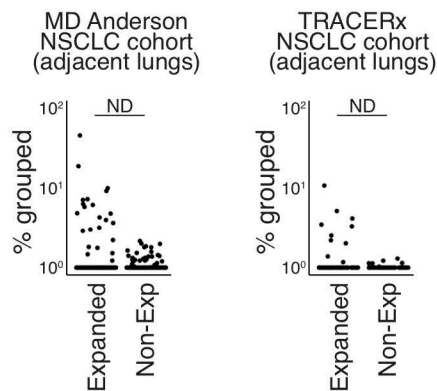

## C

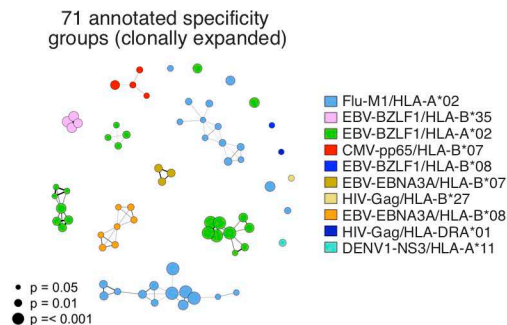

## D

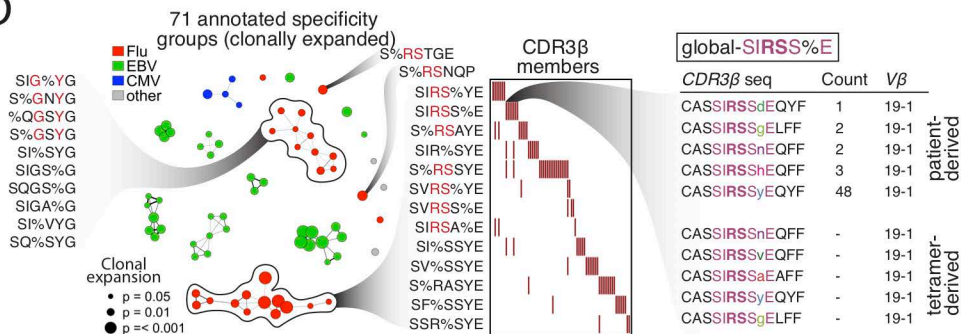

## E

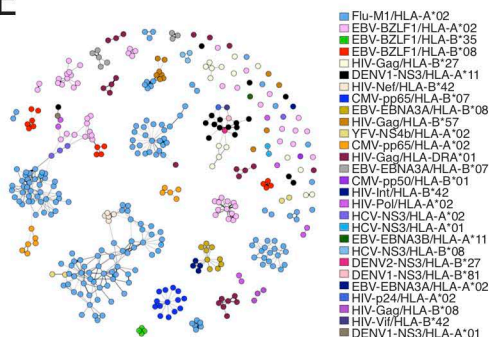

## F

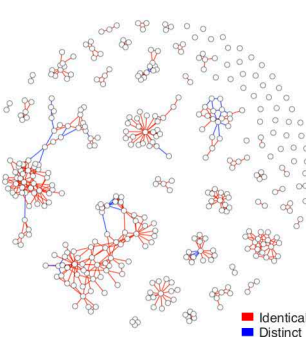

## G

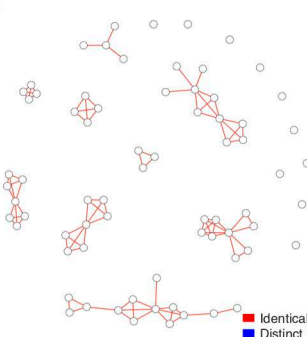

## H

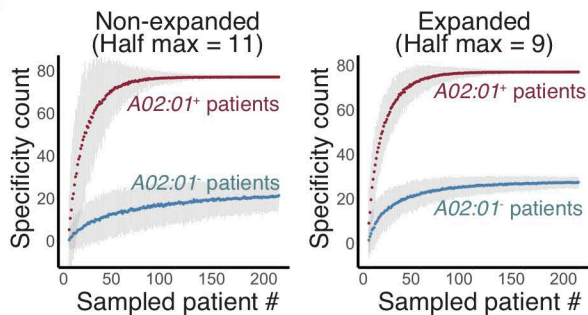

## I

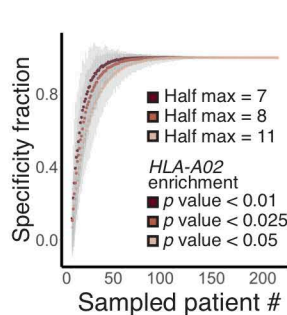

## J

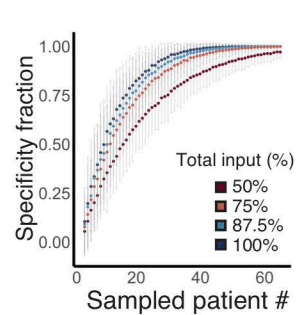

## Figure S1, related to Figure 1

**(A)** Specificity inference pipeline. **(B)** Low percentages of TCR clonotypes from adjacent lung tissues are grouped into tumor-enriched specificity groups. The percentages of the top 20 most expanded CDR3 $\beta$  clonotypes from the adjacent lung tissues of patients belonging to the MDACC NSCLC cohort (n=178 samples, left) and the TRACERx cohort (n=63 samples, right) were quantified for those that belonged to the 435 tumor-enriched specificity groups as in Figure 1B (% grouped,  $\log_{10}$ -converted). The same analysis was performed on the remainder of the CDR3 $\beta$  clonotypes (Non-exp, non-expanded). ND, no statistically significant difference was found. **(C)** The 71 clonally expanded specificity groups annotated and colored with 10 indicated tetramers are shown in the network. **(D)** Left to right, network analysis of 71 clonally expanded specificity groups colored as in Figure 1C is shown; two large Flu-related communities (red) are circled and the CDR3 $\beta$  members of the specificity groups are highlighted with the previously reported short motifs "RS" and "GxY" highlighted in red font; heatmap showing distinct CDR3 $\beta$  members (columns) of the Flu-related (with the "RS" motif) specificity groups (rows) and the levels of shared CDR3 $\beta$  members between specificity groups within the circled community; table showing an example of the "SIRSS%E" specificity group containing the short "RS" motif (bold) that is annotated with 5 Flu-specific tetramer sequences (bottom). The counts of distinct CDR3 $\beta$  members from tumor and the  $V\beta$  gene usage are shown (top). **(E)** 394 specificity groups annotated with indicated tetramers (key) were organized into distinct communities through shared CDR3 $\beta$  sequence(s) as in Figure 1C. Thickness of edge represents numbers of shared CDR3 $\beta$  sequence(s) between any two connected nodes. **(F)** Community plot as in **(E)**. Color of edge represents shared CDR3 $\beta$  sequence(s) between specificity groups with identical (red) or distinct (blue) specificities defined by tetramer-derived sequences (labeled with distinct colors, **E**). 588 of all (n=634) connections (edges) are labeled in red (92.74%). **(G)** 71 clonally expanded specificity groups as in **(C)**. Color of edge represents shared CDR3 $\beta$  sequence(s) between specificity groups with identical (red) or distinct (blue) specificities defined by tetramer-derived sequences (**C**). 92 of all (n=92) connections (edges) are labeled in red (100%). **(H-J)** TCR specificity group saturation is dependent of the level of clonal expansion, the absolute numbers of specificity groups, as well as the sequencing depth of the repertoires. **(H)** Bootstrapping for quantification of clonally expanded (right, n=77) and non-expanded (left, n=77) HLA-A\*02:01-enriched specificity groups with CDR3 $\beta$  sequences from either HLA-A02<sup>+</sup> (red) or HLA-A02<sup>-</sup> (blue) NSCLC patients. Bootstrapping was done by "sampling with replacement" and the X axis represents the number of patients randomly sampled (Sampled patient #, Methods) and the Y axis represents the numbers of specificity groups quantified with a given sampling event. Shades of error bars represent the 3X standard errors derived from 100 sampling events

for a given number of sampled patients. **(I)** Bootstrapping for quantification of *HLA-A\*02:01*-enriched specificity groups with varying cutoffs for *HLA-A\*02:01* enrichment ( $p < 0.05$ ,  $n=1267$ ;  $p < 0.025$ ,  $n=319$ ;  $p < 0.01$ ,  $n=72$ ). As in **(H)**, X axis represents the number of patients randomly sampled (Sampled patient #). Y axis represents the numbers of specificity groups quantified with a given sampling event that are normalized against the number of the total specificity groups used (Specificity fraction). Shades of error bars represent the 3X standard errors derived from 100 sampling events for a given number of sampled patients. **(J)** Bootstrapping for quantification of *HLA-A\*02:01*-enriched specificity groups with varying input CDR3 $\beta$  sequencing depth (50, 75, 87.5, or 100% of total input by random down-sampling). As in **(I)**, X axis represents the number of patients randomly sampled and Y axis represents the normalized numbers of specificity groups. Shades of error bars represent the 3X standard errors derived from 100 sampling events for a given number of sampled patients.

Figure S2

A

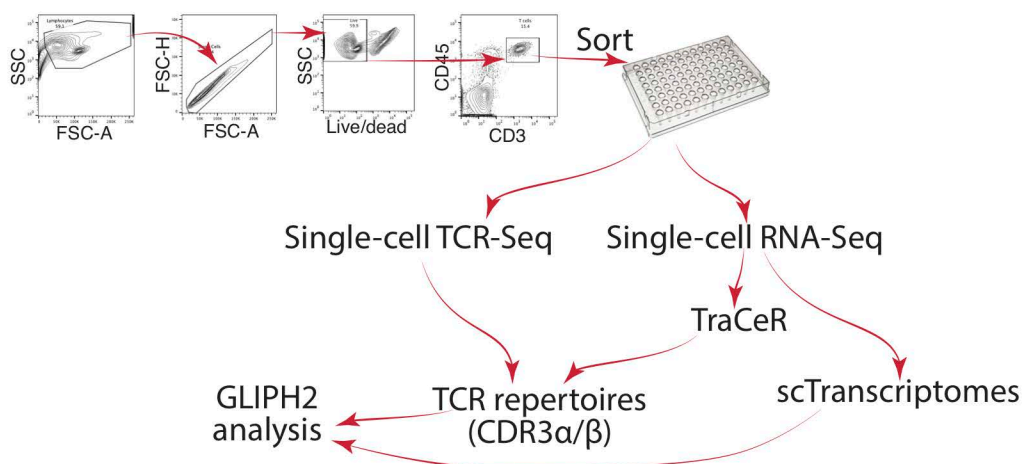

B

| Flu-related          |                      | Flu-related          |                      | EBV-related          |                      | EBV-related          |                      |
|----------------------|----------------------|----------------------|----------------------|----------------------|----------------------|----------------------|----------------------|
| Specificity group ID |
| SV%SNQP              | SIRS%YE              | S%RSTDT              |                      | RTG%GNT              |                      |                      |                      |
| <b>TCRβ</b>          | <b>Vβ</b>            | <b>TCRβ</b>          | <b>Vβ</b>            | <b>TCRβ</b>          | <b>Vβ</b>            | <b>TCRβ</b>          | <b>Vβ</b>            |
| CASSVaSNQPQHF        | TRBV9-1              | CASSIRSIEQYF         | TRBV19-1             | CASSkRSTDTQYF        | TRBV19-1             | CATRTGgGNTIYF        | TRBV6-8              |
| CASSVdSNQPQHF        | TRBV9-1              | CASSIRsgYEQFF        | TRBV19-1             | CASSdRSTDTQYF        | TRBV2-1              | CASRTGpGNTIYF        | TRBV9-1              |
| CASSVeSNQPQHF        | TRBV6-8              | CASSIRsgYEQYF        | TRBV19-1             | CASShRSTDTQYF        | TRBV19-1             | CSARTGtGNTIYF        | TRBV29-1             |
| CASSVfSNQPQHF        | TRBV19-1             | CASSIRSdYEQYF        | TRBV19-1             | CASSsRSTDTQYF        | TRBV19-1             | CASRTGdGNTIYF        | TRBV9-1              |
| CASSVgSNQPQHF        | TRBV9-1              | CASSIRSeYEQYF        | TRBV19-1             | CASSIRSTDTQYF        | TRBV19-1             | <b>CSARTGvGNTIYF</b> | TRBV20-1             |
| CASSVkSNQPQHF        | TRBV9-1              | CASSIRSaYEQFF        | TRBV19-1             | CASSeRSTDTQYF        | TRBV10-2             | CSVRTGaGNTIYF        | TRBV29-1             |
| CASSVISNQPQHF        | TRBV6-8              | <b>CASSIRSaYEQYF</b> | TRBV19-1             | <b>CASSsRSTDTQYF</b> | TRBV6-8              | CAYRTGsGNTIYF        | TRBV30-1             |
| CASSVnSNQPQHF        | TRBV10-2             |                      |                      |                      |                      | CASRTGsGNTIYF        | TRBV6-8              |
| CASSVsSNQPQHF        | TRBV19-1             |                      |                      |                      |                      |                      |                      |
| <b>CASSVtSNQPQHF</b> | TRBV4-2              |                      |                      |                      |                      |                      |                      |
| CASSVySNQPQHF        | TRBV19-1             |                      |                      |                      |                      |                      |                      |
| <b>TCR12 clone</b>   |                      | <b>TCR13 clone</b>   |                      | <b>TCR14 clone</b>   |                      | <b>TCR15 clone</b>   |                      |
| α CATDDSGGFKTIF      |                      | α CAGPTGGGSQGNLIF    |                      | α CAVTYGGSQGNLIF     |                      | α CAEDLNARLMF        |                      |
| β CASSVtSNQPQHF      |                      | β CASSIRSaYEQYF      |                      | β CASSsRSTDTQYF      |                      | β CSARTGVGNTIYF      |                      |

C

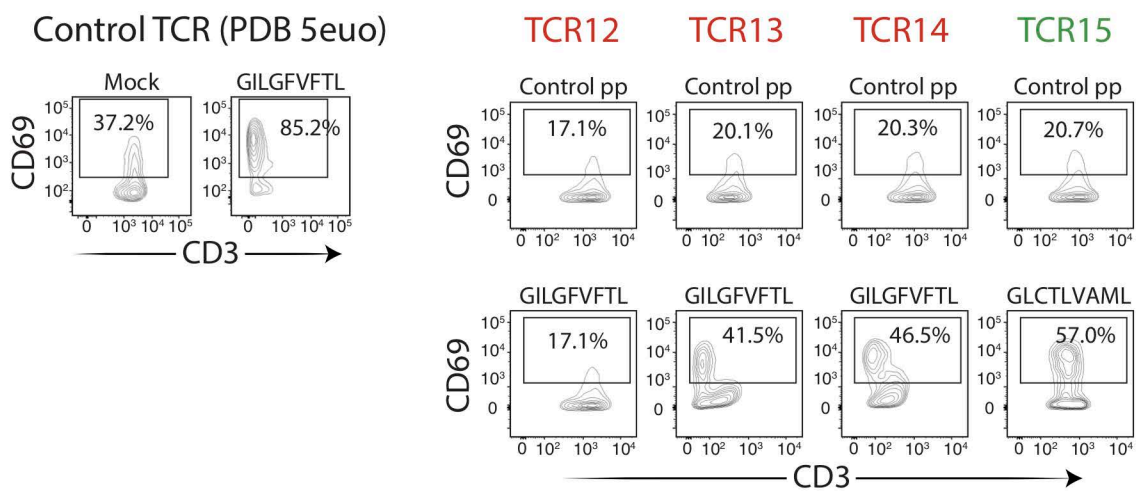

## Figure S2, related to Figure 2

**(A)** Schematic of the combined single-cell TCR-Seq and single-cell RNA-Seq (scRNA-seq) procedures. CD45<sup>+</sup>CD3<sup>+</sup> T cells were sorted from single-cell suspensions of lung tumor samples from patients with NSCLC at Stanford. Single-cell TCR-Seq was performed using nested multiplexed PCR as previously described [Han *et al.*, 2014. Nat. Biotechnol. 32, 684]. scRNA-seq was performed according to previous methods [Picelli *et al.*, 2014. Nat. Protoc. 9, 171] with modifications (STAR Methods). TCR repertoires were integrated from the single-cell TCR-Seq pipeline and from the scRNA-seq data with reconstruction using the TraCeR algorithm [Stubington *et al.*, 2016. Nat. Methods 13, 329] for GLIPH2 analysis. scTranscriptomes, single-cell transcriptomes derived from scRNA-seq. **(B)** GLIPH2 inferred clone TCR12, TCR13, and TCR14 to recognize Influenza virus M1 (FluM1) 9mer peptide "GILGFVFTL" in the context of HLA-A\*02; clone TCR15 is inferred to recognize EBV BMLF1 9mer peptide "GLCTLVAML" in the context of HLA-A\*02. Tables show subsets of CDR $\beta$  members for each specificity group. The selected T cell clones with paired CDR3 $\alpha/\beta$  sequences are highlighted in bold in the tables and the CDR3 sequences of both TCR $\alpha/\beta$  chains are shown at the bottom. All four clones were found in tumors from 2 different NSCLC patients from the Stanford cohort. **(C)** Right, the TCR  $\alpha/\beta$  sequences of the four chosen T cell clonotypes in **(B)** were ectopically expressed in TCR-deficient Jurkat-76 cells and stimulated with T2 (HLA-A02<sup>+</sup>) cells pulsed with indicated peptides (right, above FACS plots). CD69 expression quantified by FACS is shown. Left, Jurkat cells expressing the control TCR $\alpha/\beta$  chains (PDB 5euo) previously reported to recognize FluM1 in the context of HLA-A\*02 and stimulated with or without (Mock) the 9mer peptide "GILGFVFTL" are shown. Control peptide (pp), CMV/pp65<sub>495-503</sub>.

Figure S3

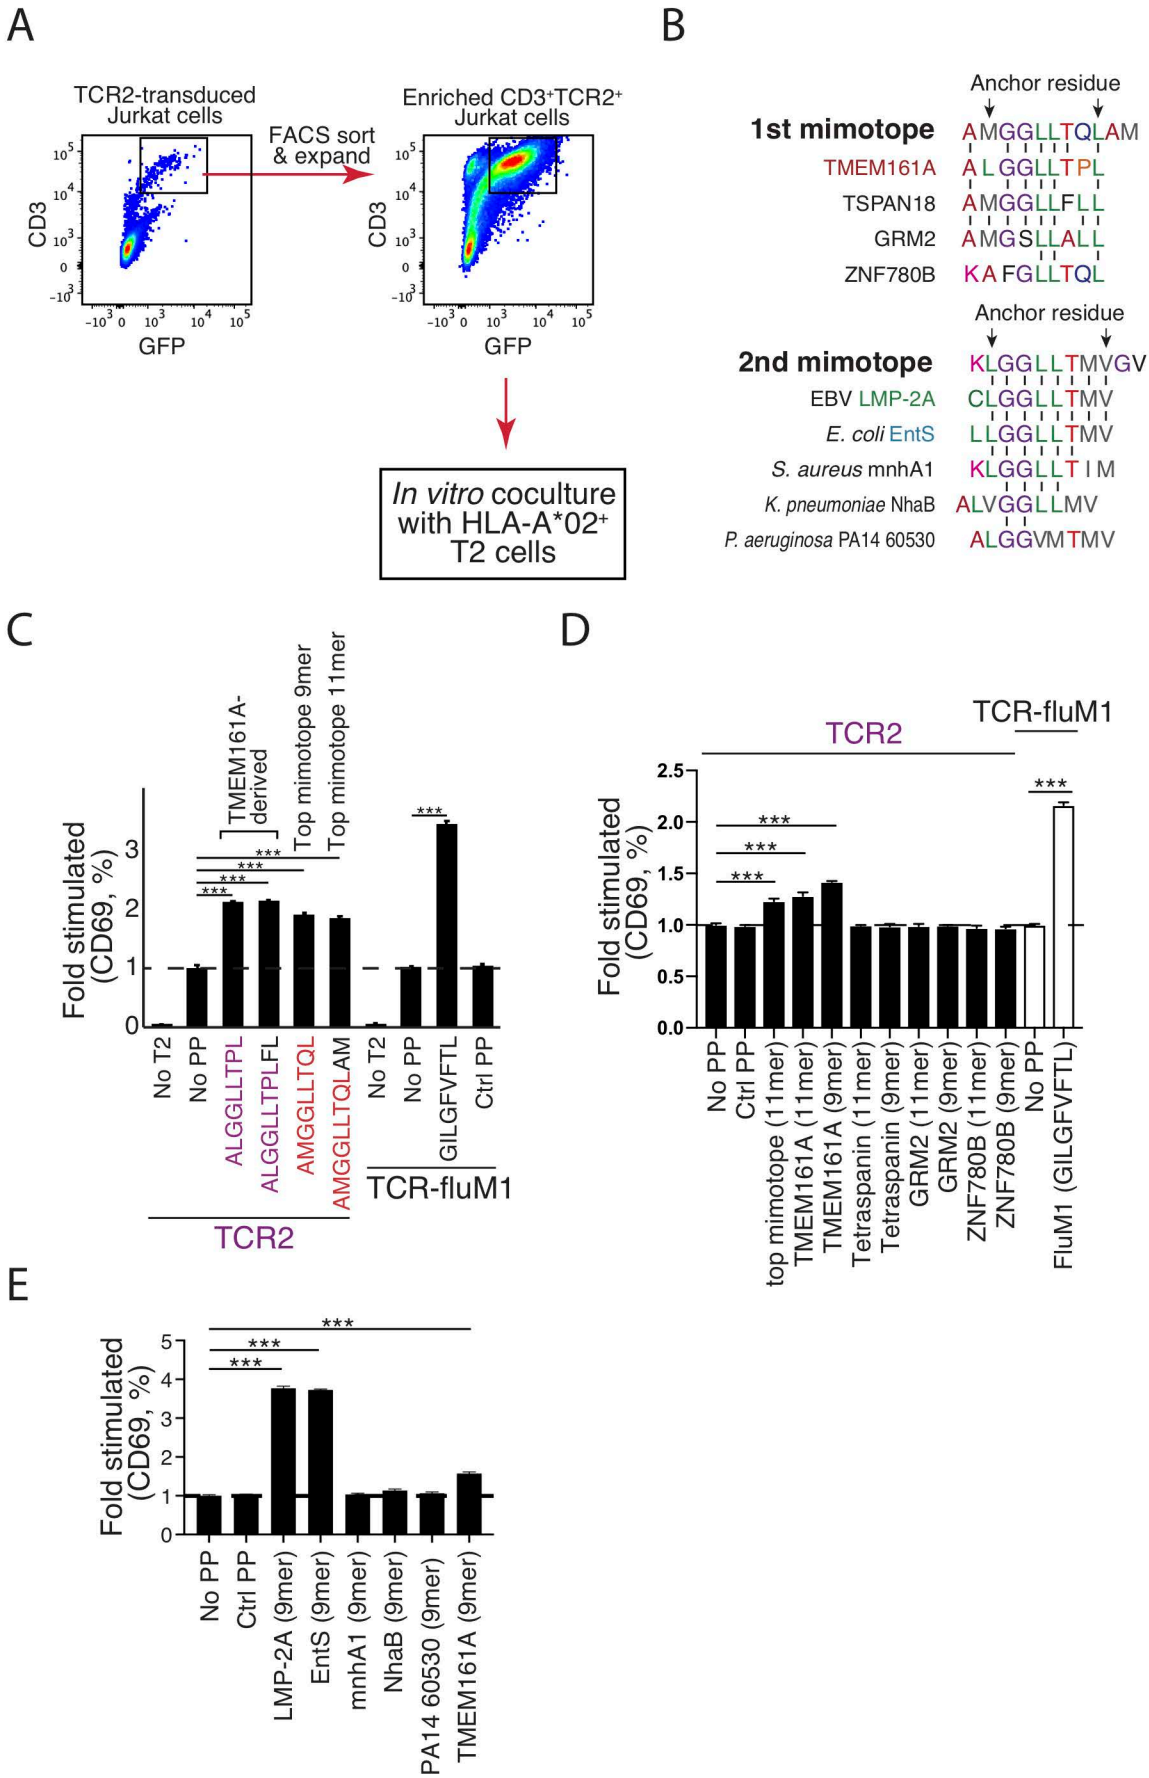

### Figure S3, related to Figure 3

**(A)** TCR-deficient Jurkat cells were transduced with lentivirus carrying a composite coding region of TCR2 $\alpha$  chain, 2A peptide sequence (2Ap), TCR2 $\beta$  chain, 2Ap, and GFP (Jurkat-TCR2). Transduced cells were subsequently sorted by FACS for the GFP<sup>+</sup>CD3<sup>+</sup> population (left) and allowed to expand (top right) and used in *in vitro* stimulation experiments (bottom right). Similar strategies were used to make other stable TCR-Jurkat clones throughout the paper. **(B)** Protein database search showed partial matches of the top 2 mimotopes with candidate coding sequences from various species. All matches were 9mers and predicted to bind HLA-A\*02 with high affinities by netMHCpan 4.0. **(C)** Jurkat-TCR2 was stimulated with T2 (HLA-A2<sup>+</sup>) cells pulsed with indicated peptides, including the top mimotope from the yeast screen (11mer, AMGGLLQLAM), the 9mer from the top mimotope predicted to bind HLA-A\*02 with high affinity (AMGGLLQL), and both 9mer/11mer peptides from the TMEM161A coding region (ALGGLLTPL and ALGGLLTPLFL, respectively) with sequence homology to the top mimotope. CD69 upregulation was quantified by FACS. Jurkat cells expressing the control TCR $\alpha$ / $\beta$  chains (TCR-fluM1, PDB 5euo) and stimulated with the cognate 9mer "GILGFVFTL", the control peptide (Ctrl PP, CMV/pp65<sub>495-503</sub>), no peptide (No PP), or no co-cultured T2 cells are included as controls. \*\*\*,  $p < 0.001$  by t test. **(D,E)** The endogenous peptides derived from human TMEM161A, LMP-2A of EBV, and EntS of *E. coli* were recognized by TCR2. Jurkat-TCR2 cells were cocultured with HLA-A02<sup>+</sup> T2 cells and pulsed with indicated peptides: Ctrl PP (control peptide), Flu/M1<sub>58-66</sub> GILGFVFTL; top mimotope 11mer, AMGGLLQLAM; TMEM161A 11mer, ALGGLLTPLFL; TMEM161A 9mer, ALGGLLTPL; Tetraspanin 11mer, AMGGLLFLGF; Tetraspanin 9mer, AMGGLLFL; GRM2 (Glutamate receptor) 11mer, AMGSLALLAL; GRM2 9mer, AMGSLALL; ZNF780B (Zinc finger protein 780B isoform X1) 11mer, KAFGLLTQLAQ; ZNF780B 9mer, KAFGLLTQL in **(D)** and Ctrl PP (control peptide), Flu/M1<sub>58-66</sub> GILGFVFTL; LMP-2A 9mer, CLGGLLTMV; EntS 9mer, LLGGLLTMV; mnhA1 9mer, KLGGLLTIM; NhaB 9mer, ALVGGLLMV; PA14 60530 9mer, ALGGVMTMV; TMEM161A 9mer, ALGGLLTPL in **(E)**. Jurkat cells expressing the control TCR (TCR-fluM1, PDB 5euo) are stimulated with the cognate 9mer "GILGFVFTL" for comparison.



Figure S4

A

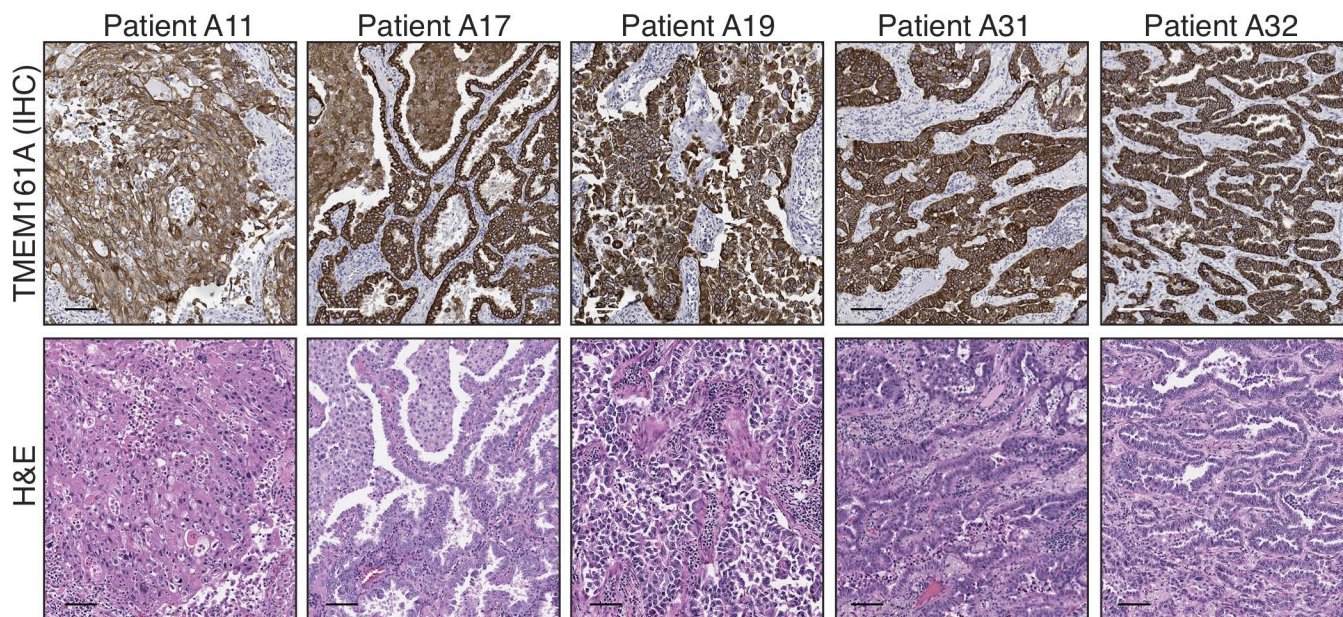

B

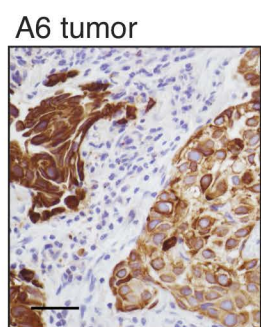

C

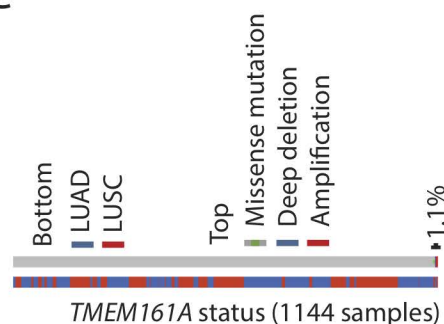

| Mutation type     | Count |
|-------------------|-------|
| Missense mutation | 4     |
| Deep deletion     | 2     |
| Amplification     | 6     |
| No alterations    | 1132  |

D

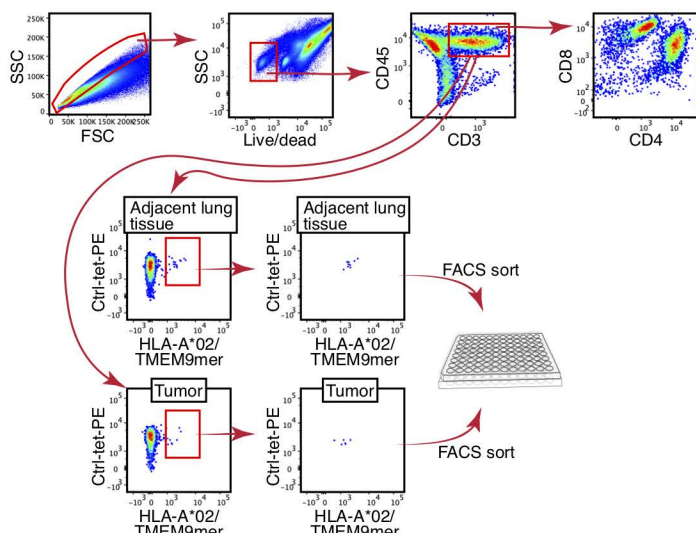

E

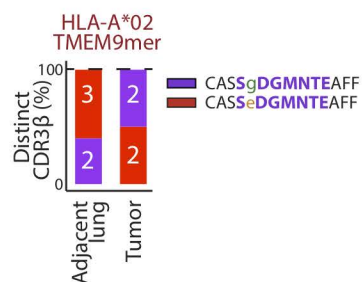

F

|   | %DGMNTE | LUSC | LUAD |
|---|---------|------|------|
| + | 21      | 10   |      |
| - | 16      | 31   |      |

$p = 5.3 \times 10^{-3}$

## Figure S4, related to Figure 4

**(A)** TMEM161A is broadly expressed on human NSCLC tumors. Representative images of TMEM161A immunohistochemistry on tumor (top) and hematoxylin & eosin (H&E) staining from adjacent sections (bottom) from Stanford patients A11, A17, A19, A31, and A32. Scale bar, 100  $\mu\text{m}$ . **(B)** Strong and dim TMEM161A staining on a section from A6 patient tumor. Scale bar, 40  $\mu\text{m}$ . **(C)** TMEM161A is a non-mutated tumor antigen. Left, percentages of all types of genetic alterations within the TMEM161A locus defined with whole-genome sequencing from the Cancer Genome Atlas (TCGA) project (pan-lung cancer cases,  $n=1144$ ) are shown. Right, number of cases with indicated genomic alterations. **(D,E)** TMEM9mer/A02 tetramer<sup>+</sup> sorted T cells from tumor and the adjacent lung tissue carry the "S%DGMNTE" motif, as predicted by GLIPH2. **(D)** Sorting HLA-A\*02/TMEM9mer<sup>+</sup>CD8<sup>+</sup> T cells from the resected tumor and the adjacent lung tissue of NSCLC patient A6 through FACS. Single cell suspensions were prepared and stained with anti-CD4, CD8, CD3, and CD45 antibodies, live/dead marker AquaZombie, PE-conjugated tetramer HLA-A\*02/viral peptides (CMV-pp65<sub>495-503</sub> and EBV-BMLF1<sub>280-288</sub>), and APC-conjugated tetramer HLA-A\*02/TMEM9mer. Specific T cells were sorted onto 96-well plates based on the following criteria: non-doublers, live cells, CD3<sup>+</sup>CD45<sup>+</sup>, HLA-A\*02/viral peptides<sup>-</sup>, and HLA-A\*02/TMEM9mer<sup>+</sup>. **(E)** Percentages (%) of distinct CDR3 $\beta$  sequences of tetramer-sorted CD8<sup>+</sup> T cells as in **(D)** from the adjacent lung tissue and tumor are shown. Numbers in bars represent the counts of sorted cells. **(F)** Numbers of A02<sup>+</sup> squamous cell lung carcinoma (LUSC) or lung adenocarcinoma (LUAD) patients from the MDACC cohort with or without detected T cells carrying the "S%DGMNTE" CDR3 $\beta$  motif.  $p$  value =  $5.3 \times 10^{-3}$  by Fisher's Exact test.

Figure S5

A

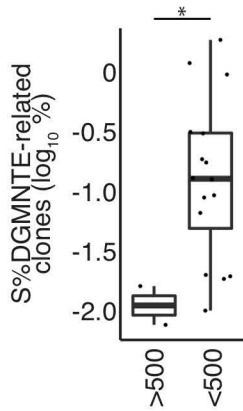

B

|                                | With S%DGMNTE motif | Without S%DGMNTE motif | Fisher's exact test |
|--------------------------------|---------------------|------------------------|---------------------|
| <b># Patients</b>              | 32                  | 47                     |                     |
| <b>Gender</b>                  |                     |                        |                     |
| M                              | 16/32 (50%)         | 29/47 (62%)            | ns                  |
| F                              | 16/32 (50%)         | 18/47 (38%)            | ns                  |
| <b>Race</b>                    |                     |                        |                     |
| Caucasian                      | 31/32 (97%)         | 43/47 (91%)            | ns                  |
| Other                          | 1/32 (3%)           | 4/47 (9%)              | ns                  |
| <b>Histology</b>               |                     |                        |                     |
| Adenocarcinoma                 | 10/32 (31%)         | 31/47 (66%)            | p < 0.01            |
| Squamous cell carcinoma        | 21/32 (65%)         | 16/47 (34%)            | p < 0.01            |
| <b>Smoking status</b>          |                     |                        |                     |
| Current smoker                 | 16/32 (50%)         | 21/47 (45%)            | ns                  |
| Former smoker                  | 16/32 (50%)         | 21/47 (45%)            | ns                  |
| Never smoker                   | 0/32 (0%)           | 5/47 (11%)             | ns                  |
| <b>Stage</b>                   |                     |                        |                     |
| I                              | 13/32 (41%)         | 23/47 (49%)            | ns                  |
| II                             | 16/32 (50%)         | 18/47 (38%)            | ns                  |
| III                            | 3/32 (9%)           | 6/47 (12%)             | ns                  |
| <b>Primary tumor size (cm)</b> | 4.6                 | 3.8                    | ns                  |
| <b>Adjuvant chemotherapy</b>   | 12/30 (40%)         | 14/46 (30%)            | ns                  |
| <b>Multifocal disease</b>      | 5/32 (16%)          | 5/47 (11%)             | ns                  |

C

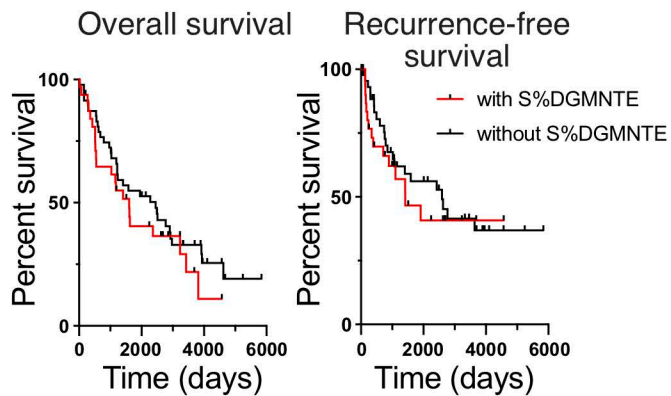

D

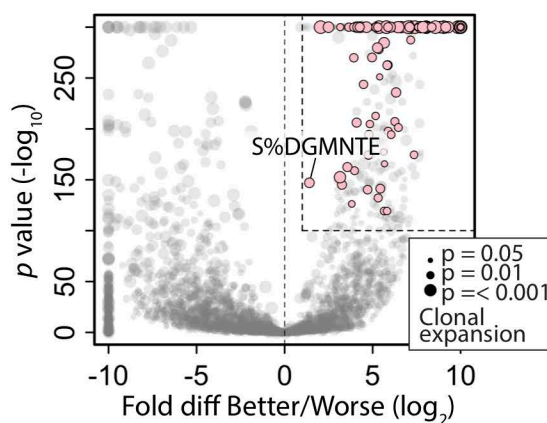

E

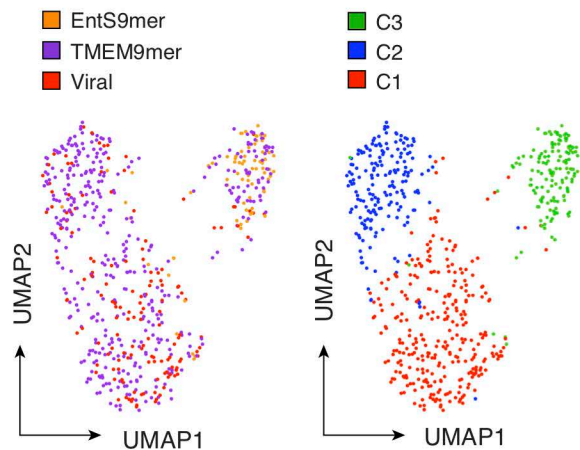

F

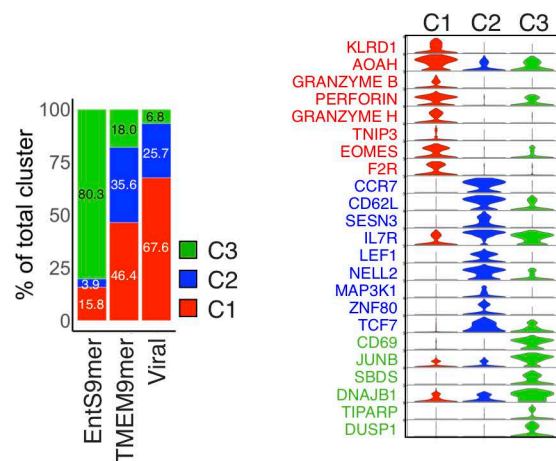

## Figure S5, related to Figure 5

**(A)** Total percentage ( $\log_{10}$ ) of T cells carrying the "S%DGMNTE" CDR3 $\beta$  motif for A02<sup>+</sup> patients from the MDACC cohorts stratified as having more than 500 (>500) or less than 500 (<500) total mutation counts (n = 34). **(B)** Break down of the clinical data of the MDACC NSCLC patient cohort stratified by detection of CDR3 $\beta$  sequences carrying the "S%DGMNTE" sequence motif. **(C)** There are no differences in overall survival (left) or recurrence-free survival (right) among patients with tumor-infiltrating T cell CDR3 $\beta$  containing the "S%DGMNTE" sequence motif (n = 32) vs patients without tumor-infiltrating T cell CDR3 $\beta$  containing the same motif (n = 49). **(D)** Volcano plot showing the probabilities of clonal biases for the 4,226 clonally expanded specificity groups between the tumors from patients with (worse, n = 88) or without recurrence (better, n = 90) by Poisson test. Tumor-enriched specificity groups that show a significant clonal bias in patients without recurrence are highlighted in pink (n = 146). Specificity group S%DGMNTE is highlighted. **(E,F)** A subset of TMEM161A-specific T cells found in healthy donors' peripheral blood reveal effector phenotype. **(E)** Dimension reduction by Uniform Manifold Approximation and Projection (UMAP) of the scRNA-Seq results from the sorted CD45<sup>+</sup>CD8<sup>+</sup>CD3<sup>+</sup> T cells from PBMC with indicated HLA-A\*02 tetramers (left) as in Fig 5A identified 3 major cell states (right, # indicates percentage of each cell state). Viral, CD8 T cells sorted with HLA-A\*02 tetramers loaded with Flu, EBV, or CMV peptides (Flu-M1<sub>58-66</sub>, CMV-pp65<sub>495-503</sub>, and EBV-BMLF1<sub>280-288</sub>). **(F)** Stacked violin plot showing the differential genes expressed by the identified cell states as in **(E)**.

Figure S6

A

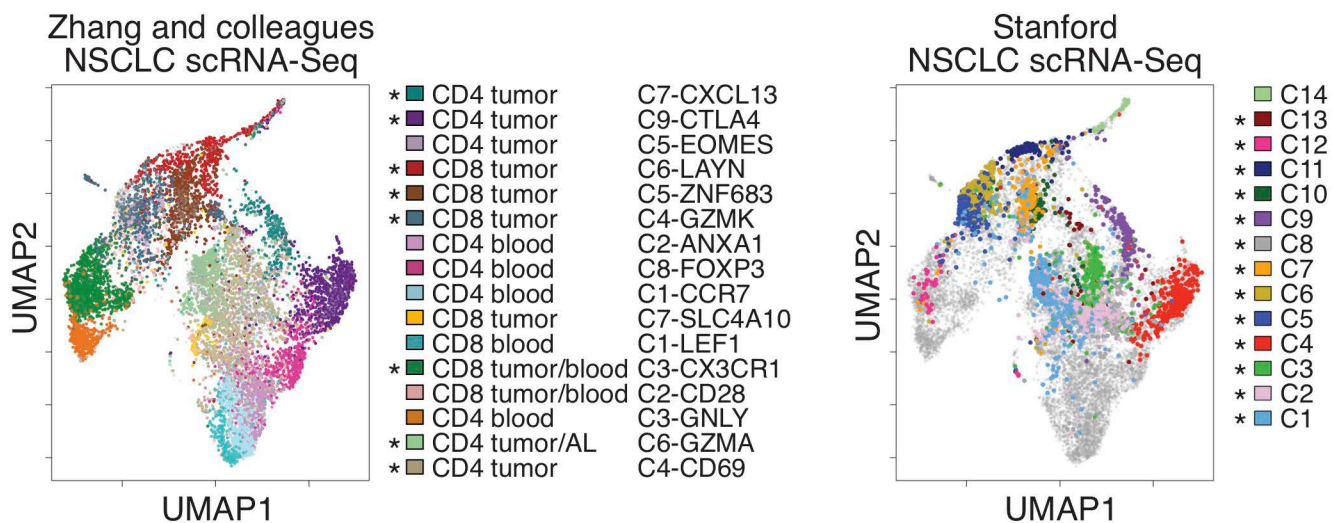

B

| Cluster ID (Stanford) | Lineage (Stanford) | Cluster ID (Guo) | Lineage (Guo) | Location (Guo) |
|-----------------------|--------------------|------------------|---------------|----------------|
| C1                    | CD4                | C6-GZMA          | CD4           | T and AL       |
| C2                    | CD4                | C4-CD69          | CD4           | T              |
| C3                    | CD4                | C4-CD69          | CD4           | T              |
| C4                    | CD4                | C9-CTLA4         | CD4           | T              |
| C5                    | CD8                | C4-GZMK          | CD8           | T              |
| C6                    | CD8                | C4-GZMK          | CD8           | T              |
| C7                    | CD8                | C5-ZNF683        | CD8           | T              |
| C8                    | CD4                | C4-CD69          | CD4           | T              |
| C9                    | CD4                | C7-CXCL13        | CD4           | T              |
| C10                   | CD8                | C5-ZNF683        | CD8           | T              |
| C11                   | CD8                | C6-LAYN          | CD8           | T              |
| C12                   | CD8                | C3-CX3CR1        | CD8           | *PB and T      |
| C13                   | CD4                | C4-GZMK/C4-CD69  | CD8/CD4       | T/T            |
| C14                   | CD4/CD8            | -                | -             | -              |

C

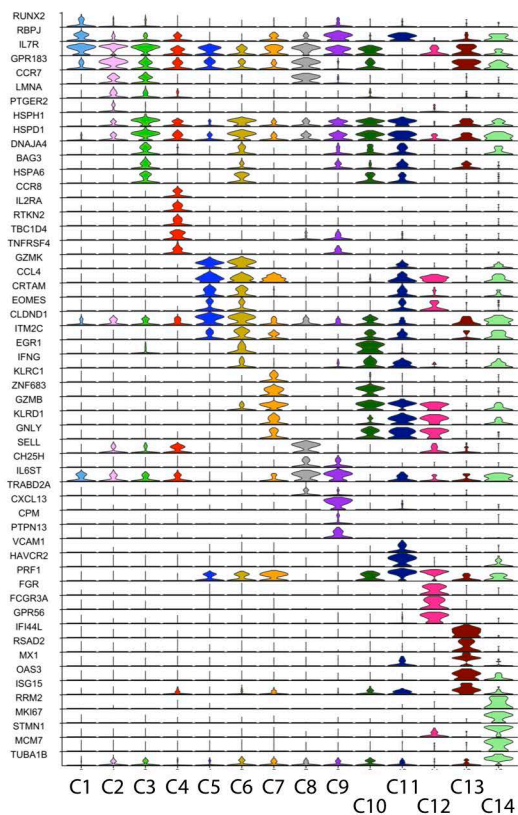

## Figure S6, related to Figure 6

**(A)** Dimension reduction by UMAP of the published NSCLC scRNA-Seq results from Zhang and colleagues (Guo *et al.* 2018. Nat. Med. 24, 978). 12,346 sorted T cells from the report by Zhang and colleagues were combined with the 2,950 sorted T cells from the current study (Stanford cohort) for a joint analysis of dimension reduction by UMAP. Cells from Zhang and colleagues are colored according to the identified cell states as reported (left) in comparison with cells from the Stanford cohort colored with the 14 cell states identified in the current study (right). \*, cell states identified by Zhang and colleagues (left) that mostly resembled at least one of the cell states identified in the current study (\*, right). AL, adjacent lung. **(B)** Cross reference of the 14 cell clusters (C1-C14) identified in the Stanford lung cancer cohort with the clusters reported by Guo *et al.* (Guo *et al.* 2018. Nat. Med. 24, 978). \*, CD8 T cells of the C3-CX3CR1 cluster could be found in both the peripheral blood and tumor (Guo *et al.* 2018. Nat. Med. 24, 978). T, tumor; AL, adjacent lung tissue; PB, peripheral blood. **(C)** Selected top differentially expressed genes for each of the identified clusters (n = 14). Expression of indicated genes were shown with the violin plot.

Figure S7

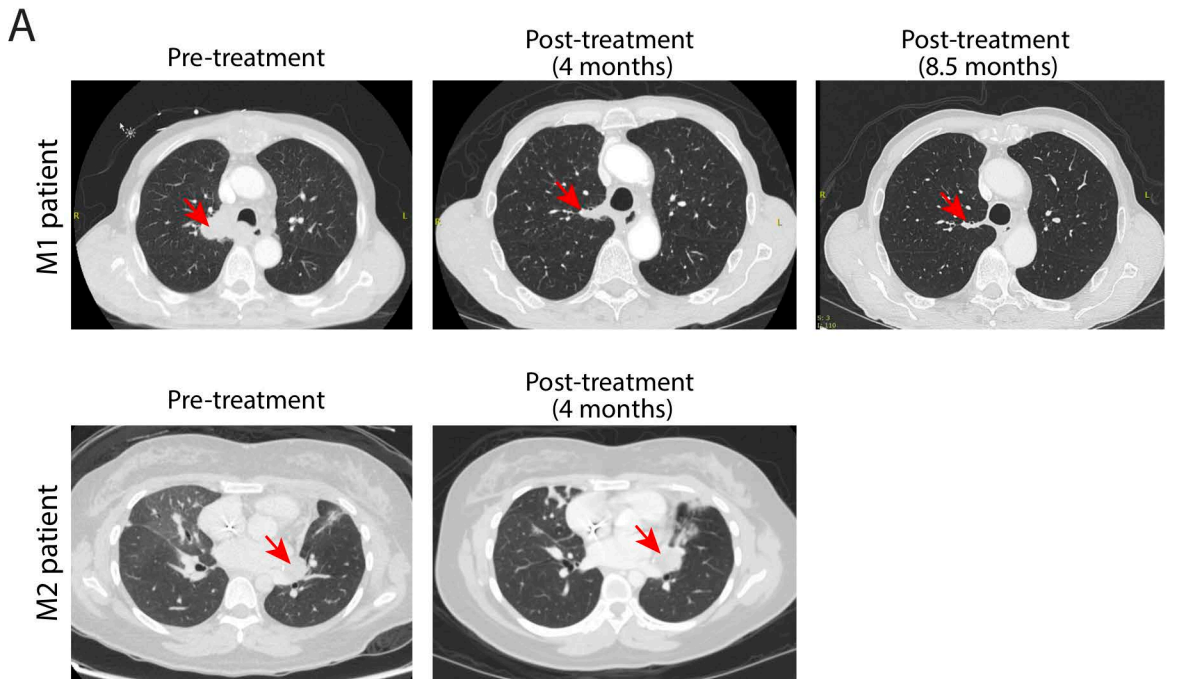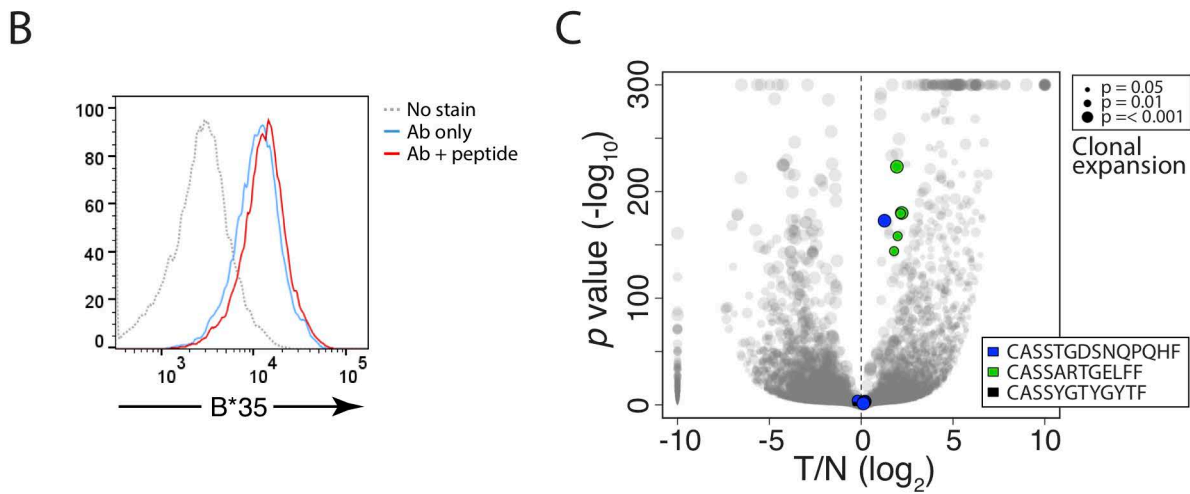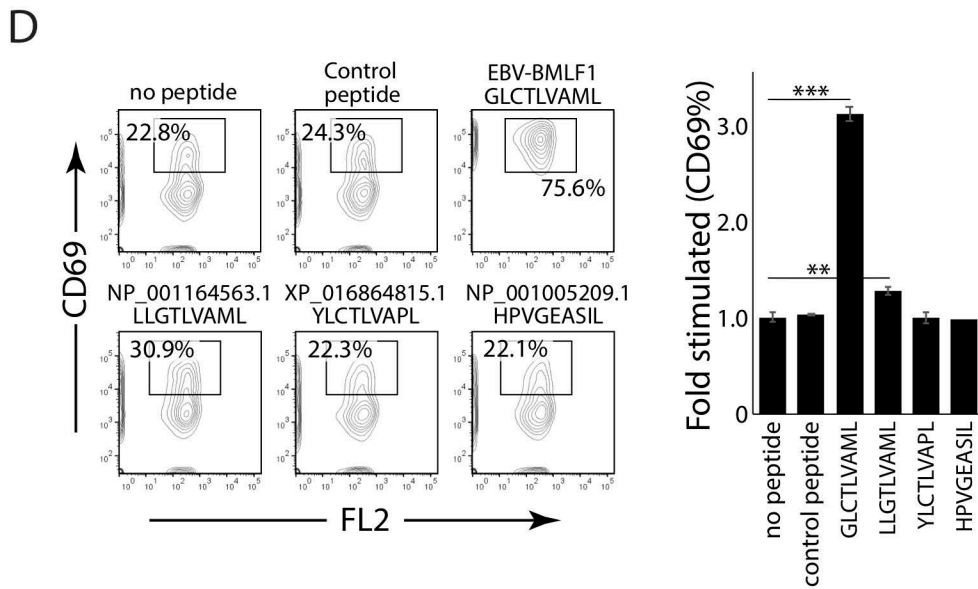

## Figure S7, related to Figure 7

**(A)** CT scan images of pre- and post-treatment from NSCLC patient M1 (top panels) and M2 (bottom panels) treated with anti-PD1 therapy. Tumors are highlighted with red arrowheads. **(B)** T2 (174 x CEM.T2) cells were transduced with lentiviral vector encoding the full-length coding sequence of WT human *HLA-B\*35:01*. Cells were selected with puromycin and the surface B\*35 expression was quantified by FACS with or without the control peptide “LPFDFTPGY” reported previously (Takamiya *et al.*, 1994. *Int Immunol.* Vol. 6, 255). **(C)** Volcano plot showing the comparison of the 66,094 shared specificity groups between tumor (T) and the adjacent lung (N) by Poisson test. The y-axis represents the negative  $\log_{10}$  converted  $p$  values of the Poisson tests and the x-axis represents the  $\log_2$  converted fold difference between tumor and the adjacent lung (T/N). Dot size represents levels of clonal expansion. Specificity groups annotated with pathogen-related tetramer CDR3 $\beta$  sequences as in Figure 7B (n=11) are highlighted according to the respective CDR3 $\beta$  sequences of the expanded clones (5<sup>th</sup> column, Figure 7B). **(D)** Left panels, representative FACS plots showing the stimulation of the Jurkat-TCR15 cells with 9mers from the EBV *BMLF1* locus (GLCTLVAML), uniprot NP\_001164563.1 (*CLDN2* locus, LLGTLVAML), XP\_016864815.1 (*SERINC5* locus, YLCTLVAPL), and NP\_001005209.1 (*TMEM198* locus, GLLCGLVAML). Right, results of Jurkat-TCR15 cell stimulation in triplicate. Control peptide: flu M1 “GILGFVFTL”. \*\*\*,  $p < 0.001$ ; \*\*,  $p < 0.01$  by student t test.





|          |          |   |                           |          |         |         |          |         |         |
|----------|----------|---|---------------------------|----------|---------|---------|----------|---------|---------|
| MDA-2054 | ADC      | F | African American          | A*23:01  | A*11:01 | B*14:02 | B*35:01  | C*08:02 | C*04:01 |
| MDA-2057 | SCC      | M | Caucasian                 | A*31:01  | A*36:01 | B*08:12 | B*40:01  | C*03:04 | C*07:01 |
| MDA-2060 | ADC      | M | Caucasian                 | A*01:01  | A*01:01 | B*08:01 | B*08:01  | C*06:02 | C*07:01 |
| MDA-2061 | SCC      | F | Caucasian                 | A*68:01  | A*68:01 | B*51:01 | B*08:01  | C*01:02 | C*07:01 |
| MDA-2068 | SCC      | F | Caucasian                 | A*26:01  | A*02:60 | B*18:01 | B*07:02  | C*01:02 | C*07:02 |
| MDA-2070 | ADC      | M | Caucasian                 | A*03:56  | A*03:01 | B*51:01 | B*35:01  | C*04:01 | C*15:02 |
| MDA-2080 | ADC      | F | Caucasian                 | A*02:01  | A*01:01 | B*08:01 | B*18:01  | C*07:01 | C*07:01 |
| MDA-2082 | ADC      | M | Caucasian                 | A*02:01  | A*01:01 | B*07:02 | B*15:01  | C*03:04 | C*07:02 |
| MDA-2088 | SCC      | M | Caucasian                 | A*11:01  | A*02:01 | B*55:02 | B*55:01  | C*05:01 | C*03:03 |
| MDA-2090 | SCC      | M | Caucasian                 | A*01:01  | A*03:56 | B*07:02 | B*15:17  | C*07:01 | C*07:01 |
| MDA-2093 | ADC      | M | African American          | A*11:01  | A*02:01 | B*15:01 | B*35:01  | C*03:03 | C*04:01 |
| MDA-2095 | ADC      | F | African American          | A*02:05  | A*03:01 | B*50:01 | B*07:02  | C*06:02 | C*07:02 |
| MDA-2097 | ADC      | M | Caucasian                 | A*02:05  | A*02:51 | B*35:02 | B*35:01  | C*04:01 | C*07:18 |
| MDA-2108 | SCC      | M | Caucasian                 | A*02:05  | A*30:01 | B*18:01 | B*57:01  | C*12:03 | C*06:02 |
| MDA-2115 | ADC      | M | African American          | A*03:04  | A*03:63 | B*51:02 | B*51:01  | C*15:02 | C*03:04 |
| MDA-2118 | ADC      | F | Asian or Pacific Islander | A*24:02  | A*01:01 | B*08:01 | B*15:01  | C*01:02 | C*07:01 |
| MDA-2121 | SCC      | F | Caucasian                 | A*03:01  | A*23:01 | B*35:01 | B*35:01  | C*04:01 | C*04:01 |
| MDA-2122 | SCC      | M | Caucasian                 | A*31:01  | A*31:01 | B*27:05 | B*40:01  | C*03:04 | C*02:02 |
| MDA-2139 | SCC      | M | Caucasian                 | A*02:01  | A*03:26 | B*27:02 | B*07:02  | C*07:02 | C*02:02 |
| MDA-2140 | SCC      | M | Caucasian                 | A*25:01  | A*01:01 | B*18:01 | B*18:13  | C*12:03 | C*12:03 |
| MDA-2150 | ADC      | F | Caucasian                 | A*03:01  | A*03:01 | B*27:05 | B*07:02  | C*07:02 | C*01:02 |
| MDA-2152 | SCC      | M | Caucasian                 | A*68:01  | A*68:01 | B*35:01 | B*44:02  | C*02:02 | C*04:01 |
| MDA-2155 | SCC      | M | Caucasian                 | A*02:01  | A*02:01 | B*08:01 | B*14:02  | C*08:02 | C*07:01 |
| MDA-2161 | SCC      | M | Caucasian                 | A*25:01  | A*02:01 | B*18:01 | B*44:02  | C*05:01 | C*12:03 |
| MDA-2175 | ADC      | M | Caucasian                 | A*02:01  | A*03:01 | B*07:02 | B*15:01  | C*03:04 | C*07:02 |
| MDA-2176 | ADC      | M | Caucasian                 | A*02:01  | A*03:01 | B*07:02 | B*18:01  | C*07:02 | C*12:13 |
| MDA-2195 | SCC      | F | Caucasian                 | A*33:01  | A*03:01 | B*14:02 | B*08:01  | C*08:02 | C*07:01 |
| MDA-2214 | ADC      | F | Caucasian                 | A*26:01  | A*26:01 | B*38:01 | B*57:01  | C*06:02 | C*12:03 |
| MDA-2221 | ADC      | M | Caucasian                 | A*24:02  | A*02:01 | B*08:01 | B*14:02  | C*08:02 | C*07:01 |
| MDA-2226 | SCC      | M | Caucasian                 | A*31:01  | A*02:01 | B*35:03 | B*35:03  | C*04:01 | C*04:01 |
| MDA-2230 | ADC      | M | Caucasian                 | A*30:02  | A*03:01 | B*53:01 | B*07:02  | C*07:19 | C*07:01 |
| MDA-2237 | ADC      | F | Caucasian                 | A*11:05  | A*33:01 | B*14:02 | B*14:02  | C*08:02 | C*08:02 |
| MDA-2240 | ADC      | F | Caucasian                 | A*26:01  | A*29:02 | B*27:05 | B*44:03  | C*01:02 | C*16:01 |
| MDA-2243 | ADC      | M | African American          | A*03:01  | A*24:02 | B*27:05 | B*07:02  | C*07:02 | C*01:02 |
| MDA-2244 | ADC      | M | Caucasian                 | A*02:01  | A*03:01 | B*15:01 | B*07:02  | C*07:02 | C*07:39 |
| MDA-2254 | ADC      | M | Caucasian                 | A*26:01  | A*11:01 | B*51:01 | B*15:01  | C*15:02 | C*04:01 |
| MDA-2262 | SCC      | M | Caucasian                 | A*03:01  | A*03:01 | B*08:01 | B*07:02  | C*07:02 | C*07:01 |
| MDA-2264 | SCC      | F | Caucasian                 | A*02:03  | A*02:03 | B*07:02 | B*07:02  | C*06:02 | C*07:02 |
| MDA-2265 | SCC      | F | Caucasian                 | A*03:01  | A*03:01 | B*07:02 | B*18:01  | C*05:01 | C*07:02 |
| MDA-2271 | ADC      | F | Caucasian                 | A*11:01  | A*11:01 | B*08:01 | B*44:02  | C*05:01 | C*07:01 |
| MDA-2276 | ADC      | F | Caucasian                 | A*01:01  | A*02:01 | B*44:02 | B*44:02  | C*05:01 | C*05:01 |
| MDA-2286 | ADC      | M | Caucasian                 | A*24:02  | A*02:03 | B*40:01 | B*51:01  | C*03:04 | C*01:02 |
| MDA-2292 | ADC      | M | Caucasian                 | A*32:01  | A*03:01 | B*07:02 | B*55:01  | C*03:03 | C*03:03 |
| MDA-2294 | ADC      | F | Caucasian                 | A*03:01  | A*03:01 | B*51:01 | B*08:01  | C*01:02 | C*07:01 |
| MDA-2300 | SCC      | M | Caucasian                 | A*24:02  | A*24:03 | B*08:01 | B*08:01  | C*07:01 | C*07:01 |
| MDA-2307 | ADC      | M | Caucasian                 | A*02:01  | A*01:01 | B*15:01 | B*51:01  | C*16:02 | C*03:04 |
| MDA-2315 | ADC      | F | Caucasian                 | A*02:01  | A*11:01 | B*35:01 | B*44:02  | C*05:01 | C*04:01 |
| MDA-2316 | ADC      | M | African American          | A*03:01  | A*03:01 | B*08:01 | B*35:01  | C*07:01 | C*04:01 |
| MDA-2318 | ADC      | F | Caucasian                 | A*30:26  | A*03:01 | B*39:01 | B*13:02  | C*06:02 | C*07:02 |
| MDA-2320 | ADC      | F | Caucasian                 | A*02:01  | A*02:01 | B*15:01 | B*44:09  | C*03:03 | C*05:01 |
| MDA-2325 | SCC      | F | Caucasian                 | A*26:01  | A*24:10 | B*18:01 | B*13:02  | C*06:02 | C*07:01 |
| MDA-2333 | ADC      | M | Caucasian                 | A*32:01  | A*24:02 | B*07:02 | B*07:02  | C*07:02 | C*02:02 |
| MDA-2335 | ADC      | F | Caucasian                 | A*25:01  | A*25:01 | B*08:01 | B*57:01  | C*06:02 | C*07:01 |
| MDA-2337 | ADC      | F | Caucasian                 | A*24:02  | A*02:01 | B*15:01 | B*15:01  | C*03:03 | C*03:04 |
| MDA-2343 | ADC      | M | Caucasian                 | A*68:02  | A*30:02 | B*15:10 | B*35:01  | C*06:02 | C*03:02 |
| MDA-2344 | SCC      | F | Caucasian                 | A*11:01  | A*02:03 | B*08:01 | B*18:01  | C*07:01 | C*07:01 |
| MDA-2345 | ADC      | M | Caucasian                 | A*01:01  | A*01:01 | B*08:01 | B*08:01  | C*07:01 | C*07:01 |
| MDA-2348 | ADC      | F | Caucasian                 | A*02:01  | A*02:01 | B*07:02 | B*07:02  | C*05:01 | C*07:02 |
| MDA-2352 | ADC      | F | Caucasian                 | A*03:01  | A*03:01 | B*51:01 | B*07:02  | C*07:02 | C*14:02 |
| MDA-3203 | ADC      | M | Caucasian                 | A*02:01  | A*11:01 | B*35:01 | B*07:02  | C*04:01 | C*07:02 |
| MDA-3212 | ADC      | F | Caucasian                 | A*30:01  | A*02:01 | B*13:02 | B*15:01  | C*03:61 | C*06:02 |
| MDA-3214 | ADC      | F | Caucasian                 | A*02:01  | A*02:89 | B*50:01 | B*38:01  | C*04:01 | C*12:03 |
| MDA-3234 | SCC      | F | Caucasian                 | A*03:01  | A*02:01 | B*51:01 | B*35:01  | C*02:02 | C*04:01 |
| MDA-3237 | SCC      | F | Caucasian                 | A*24:02  | A*24:02 | B*15:07 | B*40:01  | C*03:03 | C*03:04 |
| MDA-3238 | ADC      | M | African American          | A*33:03  | A*30:02 | B*53:01 | B*15:10  | C*03:04 | C*04:01 |
| MDA-3242 | ADC      | M | Caucasian                 | A*25:01  | A*25:01 | B*15:17 | B*18:01  | C*07:01 | C*12:03 |
| MDA-3253 | SCC      | F | Caucasian                 | A*03:01  | A*02:01 | B*07:02 | B*07:02  | C*07:02 | C*07:02 |
| MDA-3259 | ADC      | F | Caucasian                 | A*01:01  | A*01:01 | B*08:01 | B*07:02  | C*07:01 | C*07:01 |
| MDA-3260 | ADC      | M | Caucasian                 | A*29:02  | A*29:02 | B*44:03 | B*57:01  | C*16:04 | C*06:02 |
| MDA-3273 | ADC      | M | Asian or Pacific Islander | A*24:02  | A*02:01 | B*40:06 | B*40:01  | C*15:02 | C*08:01 |
| MDA-3290 | SCC      | F | Caucasian                 | A*02:251 | A*24:02 | B*07:02 | B*27:05  | C*01:02 | C*07:02 |
| MDA-4309 | ADC      | F | Caucasian                 | A*02:01  | A*02:01 | B*27:07 | B*08:01  | C*01:02 | C*07:01 |
| MDA-4347 | ADC      | F | Caucasian                 | A*03:01  | A*03:02 | B*08:01 | B*15:01  | C*03:04 | C*07:39 |
| MDA-4361 | ADC      | M | Hispanic                  | A*68:03  | A*11:01 | B*39:05 | B*40:138 | C*03:04 | C*07:02 |
| MDA-4363 | ADCA/SCC | F | Caucasian                 | A*11:01  | A*02:01 | B*35:01 | B*57:01  | C*06:02 | C*04:01 |
| MDA-4378 | ADC      | F | Caucasian                 | A*29:02  | A*11:01 | B*51:01 | B*44:03  | C*15:02 | C*16:01 |
| MDA-4382 | SCC      | M | Hispanic                  | A*31:01  | A*11:01 | B*52:01 | B*39:06  | C*07:02 | C*12:02 |
| MDA-4383 | ADC      | M | Caucasian                 | A*02:01  | A*02:01 | B*40:01 | B*57:01  | C*06:02 | C*03:04 |
| MDA-4385 | ADC      | F | Caucasian                 | A*26:01  | A*26:01 | B*37:01 | B*08:01  | C*06:02 | C*07:01 |
| MDA-4386 | ADC      | M | Caucasian                 | A*03:01  | A*03:01 | B*08:01 | B*18:01  | C*07:01 | C*07:01 |

HLA class I genotypes and clinical attributes for the MDACC NSCLC cohort (Reuben *et al.*, 2020 Nat Commun). ADC, adenocarcinoma; SCC, squamous cell carcinoma.

Table S4, related to Figure 2.

| Patient ID       | scTCR-seq | scRNA-Seq | Histology (tumor) | Histology (adjacent lung tissue) | Exome seq | Age | Gender | HLA-A*02 | Smoking (pk yr) | Stage | Histology |
|------------------|-----------|-----------|-------------------|----------------------------------|-----------|-----|--------|----------|-----------------|-------|-----------|
| A2               | yes       |           |                   |                                  |           | 65  | M      | N        | 50              | IB    | SCC       |
| A3               | yes       |           |                   |                                  |           | 71  | M      | Y        | 50              | IB    | SCC       |
| A4               | yes       |           | yes               |                                  |           | 49  | M      | Y        | 0               | IA    | adeno     |
| A5               | yes       |           | yes               | yes                              |           | 65  | F      | N        | 0               | IB    | adeno     |
| A6*              | yes       |           | yes               | yes                              |           | 73  | F      | Y        | 45              | IB    | SCC       |
| A7               |           |           | yes               | yes                              |           | 64  | M      | Y        | 118             | IB    | adeno     |
| A8               |           |           | yes               | yes                              |           | 71  | F      | Y        | 60              | IB    | adeno     |
| A9               |           |           | yes               |                                  |           | 77  | M      | N        | 45              | IB    | adeno     |
| A10              |           |           | yes               | yes                              |           | 82  | F      | N        | 0               | IIA   | adeno     |
| A11              | yes       | yes       | yes               | yes                              | yes       | 76  | F      | Y        | 50              | IIIA  | adeno     |
| A14              |           |           | yes               | yes                              |           | 62  | F      | Y        | 10              | IA    | adeno     |
| A15              | yes       | yes       | yes               | yes                              | yes       | 71  | F      | N        | 3               | IB    | adeno     |
| A16              | yes       | yes       | yes               | yes                              | yes       | 68  | F      | N        | 20              | IB    | adeno     |
| A17              | yes       | yes       | yes               | yes                              | yes       | 65  | F      | Y        | 0               | IA    | adeno     |
| A18              | yes       | yes       | yes               | yes                              |           | 65  | M      | N        | 30              | IB    | adeno     |
| A19              | yes       | yes       | yes               | yes                              | yes       | 70  | F      | N        | 37              | IIA   | adeno     |
| A21              |           |           | yes               | yes                              |           | 31  | M      | N        | 0               | IIIA  | adeno     |
| A28              | yes       | yes       | yes               | yes                              | yes       | 64  | M      | N        | 24              | IA    | adeno     |
| A29              | yes       | yes       | yes               | yes                              | yes       | 64  | F      | Y        | 0               | IA    | adeno     |
| A31              | yes       | yes       | yes               | yes                              | yes       | 68  | F      | Y        | 0               | IIIB  | adeno     |
| A32              | yes       | yes       | yes               | yes                              | yes       | 49  | F      | N        | 0               | IB    | adeno     |
| Total # with yes | 15        | 10        | 19                | 17                               | 9         | -   | -      | -        | -               | -     | -         |

Data availability and clinical attributes of the Stanford NSCLC cohort. Single-cell TCR-seq was performed on 15 patients, single-cell RNA-seq was performed on 10 patients, histology was performed on tumors from 19 patients and the adjacent lung tissues from 17 patients, and 9 NSCLC patients have tumors assessed with whole-exome sequencing (yes, data available). A6\*, the paired TCR CDR3 $\alpha/\beta$  sequences from the tumor of patient A6 were derived by using the Chromium Single Cell Immune Profiling Solution for human T cell repertoires from the 10x Genomics. M, male; F, female; N, HLA-A\*02<sup>-</sup>; Y, HLA-A\*02<sup>+</sup>; adeno, adenocarcinoma; SCC, squamous cell carcinoma.

Table S5, related to Figure 3.

| Rank | Peptide seq (Naive) | #  | Peptide seq (Round 1) | #  | Peptide seq (Round 2) | #   | Peptide seq (Round 3) | #     | Peptide seq (Round 4) | #     |
|------|---------------------|----|-----------------------|----|-----------------------|-----|-----------------------|-------|-----------------------|-------|
| 1    | SMQGLTRPPRV         | 43 | VMRQLACSRRL           | 25 | RLHVAPGQRRM           | 149 | AMGGLLTQLAM           | 14764 | AMGGLLTQLAM           | 70220 |
| 2    | AMGGLLTQLAM         | 30 | FLQNGRSSERM           | 24 | RLREAAPIPLM           | 108 | EMRVASAMWGM           | 1205  | KLGLLTMVGV            | 23704 |
| 3    | ALRTPRKKQTL         | 17 | RLQSRKLPPLL           | 22 | PMDTHLPTSVL           | 89  | GMVEDICSTLL           | 712   | GMVEDICSTLL           | 18950 |
| 4    | CLTQSSQEWTL         | 16 | TLARTHHTRRL           | 20 | AMQERLGRQV            | 88  | RLHEQVPEVTL           | 557   | EMRVASAMWGM           | 11431 |
| 5    | KLDSANAQIV          | 13 | HMHRPRPSGRL           | 19 | WLTAALPCGV            | 88  | HLRVKEHRHGL           | 469   | RLHEQVPEVTL           | 3165  |
| 6    | PMLTRSPLSRM         | 10 | DLLVQKIRHL            | 18 | CLPWQKTESPL           | 81  | HMHHHNEHNRM           | 468   | KMKMKHHRPL            | 2760  |
| 7    | WMRQMEPSGRL         | 10 | RLNELRLAKGL           | 18 | RLTRTQGSSETL          | 78  | RLHVAPGQRRM           | 315   | HMHHHNEHNRM           | 1229  |
| 8    | GMLASLAARQV         | 10 | RLHKAPRPAPL           | 18 | NMEALGHCHRL           | 77  | PLACAKRRGGM           | 280   | ALNLPSSPSSL           | 1019  |
| 9    | EMTLPTAKWL          | 9  | DLQSTLEAWAV           | 17 | RMEQVATARVL           | 73  | NLKLMIWIEM            | 268   | KMPHRPKHKVV           | 987   |
| 10   | WLSLAAPPAL          | 9  | RMSSRPSLLL            | 17 | RLAEPHSWIRL           | 67  | ALNLPSSPSSL           | 264   | HLRVKEHRHGL           | 968   |
| 11   | RLWQRPVTRL          | 9  | GMRTGPRWRHL           | 17 | RLHVRPGRPL            | 67  | NLRHRHPSRFL           | 262   | HMHEHRVKGKV           | 841   |
| 12   | GLGIAPALTDL         | 9  | HMTGKHRTHMV           | 17 | MMRTGPLGLL            | 67  | SMPKRGTQVTM           | 261   | RLHVRPGRPL            | 834   |
| 13   | RMPTRRPTKRM         | 9  | AMHRNSRWHS            | 16 | RMLTRSRLAL            | 67  | HMHEHRVKGKV           | 260   | WLETPTPLLL            | 818   |
| 14   | PLAHTPPRRTL         | 9  | ALSARLPQAL            | 16 | HMSRTHAPGQL           | 67  | RLHVRPGRPL            | 259   | PLACAKRRGGM           | 573   |
| 15   | TLMRHLHAGVVL        | 9  | RLHAPTHHSL            | 16 | MMSCPAQEPCL           | 67  | ALREKPRLPRL           | 257   | NLRHRHPSRFL           | 459   |
| 16   | RMGPLALSPSM         | 9  | ALSARLSRPV            | 16 | TMKTQGGQESM           | 66  | RLPARHPPEAL           | 255   | PLTSARKPRM            | 396   |
| 17   | AMPNPRVREHL         | 9  | RLPPLPQWPL            | 15 | RLAHRARQVQV           | 65  | RLPEPPARPL            | 249   | RLHGRPTRWNL           | 382   |
| 18   | AMLTLTRGQQM         | 9  | PLTPTPRPGSM           | 15 | RMSGKPPQHPL           | 65  | RLAKVPQGT             | 248   | HMPRHRWAARV           | 359   |
| 19   | PLPPPLRPPM          | 9  | PLLATARTWV            | 15 | NLLPWRTKLM            | 63  | QLRLASTPRGL           | 247   | SMGGLLTQLAM           | 350   |
| 20   | RMTMTARRRPV         | 9  | ALEASWEWTGM           | 15 | VMRTPRRPVPL           | 63  | QMTARGRVHLL           | 234   | RMPAAARKRGV           | 326   |
| 21   | GLLQMLMSLAV         | 9  | VLPAHAPGGL            | 15 | KLAAGKQGLAM           | 63  | RMACGQHPGPL           | 218   | RLPARHPPEAL           | 314   |
| 22   | RLPLEPHRQCM         | 8  | ELARSHRAWSM           | 14 | RLRAHQHMFRV           | 61  | RMPAAARKRGV           | 217   | HMRGGRHSRLM           | 302   |
| 23   | LLASPTGVTKM         | 8  | EMTCQLGPKPL           | 14 | RLKPPQVPAL            | 61  | RMLTRSRLAL            | 216   | KMKSHHLRWGL           | 299   |
| 24   | RLQVLPNSPCV         | 8  | GLPPSAARKVL           | 14 | NLKLMIWIEM            | 60  | KMHQHGQHRQL           | 214   | PMEPSPCTGV            | 293   |
| 25   | KLHPNTCAKGM         | 8  | TLKSHHHWGQL           | 14 | PLRPPSLPTKM           | 60  | RLHGRPTRWNL           | 212   | KMHQHGQHRQL           | 286   |
| 26   | TLSPSTGTISM         | 8  | RLIPWRTLLL            | 14 | VLGWDEPGTV            | 60  | LLPLAPRRGV            | 193   | HLMGTRGHRCL           | 282   |
| 27   | RLCARMWNQSV         | 8  | RMPPTPAPKGM           | 14 | EMLTGAVGTP            | 60  | HLHSHARTPRM           | 190   | ALREKPRLPRL           | 268   |
| 28   | AMRPPSMATRL         | 8  | HMPRDQNRVAL           | 14 | PMIAIHPSSQL           | 59  | KLGLLTMVGV            | 188   | HLRLRHHHREL           | 267   |
| 29   | ALPLRPARLSL         | 8  | PLHGRQLRAL            | 14 | TLQEQTARTRM           | 59  | QLSGAHHHRAL           | 187   | RMPRPPISPL            | 263   |
| 30   | RLRWIMLRDAL         | 8  | TLMKRPGLRGL           | 14 | RMHARMTSKL            | 59  | RLHHPHQLRPM           | 178   | RLRPHMLPRL            | 260   |
| 31   | CLESCLRAMQL         | 8  | LLPPTPPHAV            | 14 | AMPRAPRSSWV           | 59  | HLMGTRGHRCL           | 175   | HMARPGPHRHL           | 256   |
| 32   | PLPLTQRTPAV         | 8  | RLARSQQHSL            | 14 | GLSGPCQPAL            | 58  | RMPAQRVAQAM           | 170   | HLHPHPPGAL            | 247   |
| 33   | NLRQREGTRIL         | 7  | RMDHMPWHVRL           | 14 | RLQMSSRRHHV           | 58  | KLNGQVSEML            | 169   | HMHRPRPSGRL           | 241   |
| 34   | RLPSLERWPRL         | 7  | EMPMPAAQPL            | 14 | RMTPLQAEAL            | 58  | TLTPAQPPVLL           | 168   | HMQRGTHTKV            | 229   |
| 35   | GMWARSVRASL         | 7  | HLSKPRRRHEL           | 14 | TMPPGLWQAV            | 58  | LMCTMAAASRL           | 168   | HMPKPRTRVPL           | 208   |
| 36   | ALRGVRRTRVL         | 7  | ALCLASREVL            | 14 | RLAPPRLPHIV           | 57  | RLPTMGTPPL            | 167   | HLHSHARTPRM           | 206   |
| 37   | TLLVSTLRGCL         | 7  | TMQHGAAQTAL           | 13 | RLPAPHRPETV           | 57  | MLKRPRTPRQV           | 165   | MLFDGLPLLV            | 202   |
| 38   | RLSQSHRPRPL         | 7  | TMRTCTERTPM           | 13 | RLMWAKQEMLL           | 57  | KMKMKHHRPL            | 164   | RLHVAPGQRRM           | 193   |
| 39   | WMRWVREPVRM         | 7  | EMAPHAMLERV           | 13 | RLSRPPLPTGV           | 56  | HLRLRHHHREL           | 162   | SMPKRGTQVTM           | 186   |
| 40   | QLSAPLAPRSL         | 7  | NLTWLPATRL            | 13 | RLPMHPPALAV           | 56  | PLSAWTATASL           | 162   | RMPPPRPLAL            | 184   |
| 41   | LLRGQRLEHLL         | 7  | RLHQPPRPLPL           | 13 | RLPEPPGPAAV           | 56  | LLQEEHRHPTV           | 162   | RLHHRVVLPL            | 179   |
| 42   | CLLTTPTPTAL         | 7  | RLDKVPRPGPL           | 13 | RMARHRPLQL            | 56  | RMPRPPISPL            | 160   | QMTARGRVHLL           | 177   |
| 43   | QLTRWRHRSKGM        | 7  | GLQRVTGHRPL           | 13 | RMACGQHPGPL           | 56  | RLHKSPPWRSV           | 160   | RLPLPAPRLV            | 177   |
| 44   | HLPWLPKHGRM         | 7  | KLAPPNRPPL            | 13 | KLFSGKSGQVL           | 55  | RLPARCLGAV            | 160   | RLPEPPGPAAV           | 172   |
| 45   | PMAFRGWHTWM         | 7  | HMRRPPVRL             | 13 | RLPARPGLRV            | 55  | RMPPLQSGCL            | 159   | TLAPPAPRPL            | 169   |
| 46   | TMHGPRSRRL          | 7  | ELPGCAPQCLM           | 13 | GMSMGPSQCR            | 55  | RLRPGSNAVLM           | 153   | TLPLHQPPKLV           | 169   |
| 47   | SLAWRAGAMDM         | 7  | PLGPPRLRPL            | 13 | DMTSRLVRWAM           | 54  | HMPRHRWAARV           | 153   | HLARPPPARL            | 164   |
| 48   | RLNPKGTSAM          | 7  | SLPSAPRHGNL           | 13 | ELRRAEELRNV           | 54  | ALAPTRATRRV           | 151   | RMRAPHPHTRL           | 164   |
| 49   | RLSKSLRHTCM         | 7  | PMPAPPLTLP            | 13 | QLRLASTPRGL           | 54  | DLLPQPWARGM           | 149   | RMRFSHPHKQL           | 162   |
| 50   | AMMQSLPAPGM         | 7  | VLLPPLESPL            | 13 | KMRRTGLLDV            | 54  | PMVSGEHRGAV           | 149   | AMARPPPARL            | 161   |

Summary of results from each round of affinity selection on a 11mer yeast HLA-A\*02 library with TCR2. Numbers (#) indicate counts of the top-50 mimotopes. Top-two mimotopes from the round 4 screen were highlighted.

Table S6, related to Figure 4.

| Sample ID | Gene ID   | Unique mut ID       | Var class | Var type          | AA var | coverage | Ref depth | Alt depth | af     | dbsnp | exac  | counts_cohomic | filter |
|-----------|-----------|---------------------|-----------|-------------------|--------|----------|-----------|-----------|--------|-------|-------|----------------|--------|
| A6        | ABCA13    | chr7:48313276:C>G   | exonic    | nonsense          | S1338X | 74       | 64        | 10        | 0.144  | FALSE | FALSE | 0              | PASS   |
| A6        | ABCC11    | chr16:48201528:G>T  | exonic    | nonsynonymous_snv | T1312K | 143      | 119       | 24        | 0.172  | FALSE | FALSE | 0              | PASS   |
| A6        | ADAM7     | chr8:24346811:G>A   | exonic    | nonsynonymous_snv | D411N  | 71       | 55        | 16        | 0.233  | FALSE | FALSE | 0              | PASS   |
| A6        | ADGRB3    | chr6:69653730:G>C   | exonic    | nonsynonymous_snv | V347L  | 74       | 64        | 10        | 0.145  | FALSE | FALSE | 0              | PASS   |
| A6        | AKAP9     | chr7:91707139:G>A   | exonic    | nonsynonymous_snv | E2291K | 110      | 96        | 14        | 0.133  | FALSE | FALSE | 0              | PASS   |
| A6        | ALS2      | chr2:202622283:C>A  | exonic    | nonsynonymous_snv | S438I  | 92       | 76        | 16        | 0.18   | FALSE | FALSE | 0              | PASS   |
| A6        | ANK2      | chr4:114274311:G>C  | exonic    | nonsynonymous_snv | D1513H | 85       | 68        | 17        | 0.206  | FALSE | FALSE | 0              | PASS   |
| A6        | ANKFN1    | chr17:54520251:G>T  | exonic    | nonsynonymous_snv | W355C  | 86       | 75        | 11        | 0.136  | FALSE | FALSE | 0              | PASS   |
| A6        | ANKLE2    | chr12:133327337:C>T | exonic    | nonsynonymous_snv | E247K  | 265      | 200       | 65        | 0.246  | FALSE | FALSE | 0              | PASS   |
| A6        | ANKS1B    | chr12:99640454:T>G  | exonic    | nonsynonymous_snv | K649Q  | 83       | 72        | 11        | 0.14   | FALSE | FALSE | 0              | PASS   |
| A6        | ARHGEF17  | chr11:73021562:A>C  | exonic    | nonsynonymous_snv | T627P  | 360      | 290       | 70        | 0.196  | FALSE | FALSE | 0              | PASS   |
| A6        | ARL2      | chr11:64785853:G>A  | exonic    | nonsynonymous_snv | G28E   | 318      | 265       | 53        | 0.168  | FALSE | FALSE | 0              | PASS   |
| A6        | ASB9      | chrX:15266932:C>T   | exonic    | nonsynonymous_snv | G232S  | 204      | 167       | 37        | 0.184  | FALSE | FALSE | 0              | PASS   |
| A6        | ASIC2     | chr17:32483281:G>T  | exonic    | nonsynonymous_snv | L91I   | 513      | 426       | 87        | 0.17   | FALSE | FALSE | 0              | PASS   |
| A6        | ATP13A5   | chr3:193048947:T>C  | exonic    | nonsynonymous_snv | M476V  | 115      | 71        | 44        | 0.385  | FALSE | FALSE | 0              | PASS   |
| A6        | ATP4B     | chr13:114312422:C>T | exonic    | nonsynonymous_snv | R13H   | 685      | 631       | 54        | 0.079  | TRUE  | TRUE  | 0              | PASS   |
| A6        | ATP7A     | chrX:77296175:G>A   | exonic    | nonsynonymous_snv | E1249K | 235      | 211       | 24        | 0.104  | FALSE | FALSE | 0              | PASS   |
| A6        | AUTS2     | chr7:69364300:G>A   | exonic    | nonsynonymous_snv | R113H  | 80       | 52        | 28        | 0.353  | TRUE  | TRUE  | 3              | PASS   |
| A6        | BAI3      | chr6:69653730:G>C   | exonic    | nonsynonymous_snv | V347L  | 74       | 64        | 10        | 0.135  | FALSE | FALSE | 0              | PASS   |
| A6        | BCOR      | chrX:39933652:G>C   | exonic    | nonsynonymous_snv | P316R  | 654      | 593       | 61        | 0.094  | FALSE | FALSE | 0              | PASS   |
| A6        | BLVR4     | chr7:43830961:A>T   | exonic    | nonsynonymous_snv | Y83F   | 73       | 61        | 12        | 0.173  | FALSE | FALSE | 0              | PASS   |
| A6        | C1orf173  | chr1:75065441:C>T   | exonic    | nonsynonymous_snv | R555H  | 67       | 58        | 9         | 0.134  | TRUE  | TRUE  | 1              | PASS   |
| A6        | C20orf141 | chr20:2795930:C>A   | exonic    | nonsynonymous_snv | R34S   | 498      | 421       | 77        | 0.155  | FALSE | FALSE | 0              | PASS   |
| A6        | C20orf203 | chr20:31238353:C>A  | exonic    | nonsynonymous_snv | A156S  | 742      | 622       | 120       | 0.162  | FALSE | FALSE | 0              | PASS   |
| A6        | CACNA1A   | chr19:13409626:C>G  | exonic    | nonsynonymous_snv | E941Q  | 697      | 576       | 121       | 0.174  | FALSE | FALSE | 0              | PASS   |
| A6        | CAST      | chr5:96031574:C>G   | exonic    | nonsynonymous_snv | S58C   | 54       | 37        | 17        | 0.32   | FALSE | FALSE | 0              | PASS   |
| A6        | CC2D2A    | chr4:15504120:G>C   | exonic    | nonsynonymous_snv | E106Q  | 232      | 177       | 55        | 0.239  | FALSE | FALSE | 0              | PASS   |
| A6        | CCDC159   | chr19:11460855:T>A  | exonic    | nonsynonymous_snv | I69N   | 149      | 135       | 14        | 0.098  | FALSE | FALSE | 0              | PASS   |
| A6        | CCDC22    | chrX:49104195:C>A   | exonic    | nonsynonymous_snv | A353D  | 1037     | 946       | 91        | 0.088  | FALSE | FALSE | 0              | PASS   |
| A6        | CCN1      | chr10:97817990:G>A  | exonic    | nonsynonymous_snv | E371K  | 120      | 93        | 27        | 0.229  | FALSE | FALSE | 1              | PASS   |
| A6        | CEP128    | chr14:81251610:C>T  | exonic    | nonsynonymous_snv | E614K  | 109      | 75        | 34        | 0.315  | FALSE | FALSE | 0              | PASS   |
| A6        | CEP95     | chr17:62533725:T>C  | exonic    | nonsynonymous_snv | L765S  | 63       | 51        | 12        | 0.2    | FALSE | FALSE | 0              | PASS   |
| A6        | CHIC1     | chrX:72783256:G>C   | exonic    | nonsynonymous_snv | E46Q   | 338      | 270       | 68        | 0.203  | FALSE | FALSE | 0              | PASS   |
| A6        | CLGN      | chr4:141317335:T>C  | exonic    | nonsynonymous_snv | I303M  | 149      | 120       | 29        | 0.197  | FALSE | FALSE | 0              | PASS   |
| A6        | CNBD1     | chr8:88249177:T>C   | exonic    | nonsynonymous_snv | L203P  | 67       | 48        | 19        | 0.288  | FALSE | FALSE | 0              | PASS   |
| A6        | COL22A1   | chr8:139618637:G>C  | exonic    | nonsynonymous_snv | P1364R | 69       | 55        | 14        | 0.211  | FALSE | FALSE | 0              | PASS   |
| A6        | COL4A1    | chr13:110835623:C>A | splicing  | splice            | G633V  | 151      | 109       | 42        | 0.278  | FALSE | FALSE | 0              | PASS   |
| A6        | COL9A1    | chr6:70965071:G>T   | exonic    | nonsynonymous_snv | P509H  | 61       | 55        | 6         | 0.109  | FALSE | FALSE | 0              | PASS   |
| A6        | CTNNA2    | chr2:80816447:C>A   | exonic    | nonsynonymous_snv | P676T  | 114      | 88        | 26        | 0.232  | FALSE | FALSE | 0              | PASS   |
| A6        | DAW1      | chr2:228767798:G>C  | exonic    | nonsynonymous_snv | Q192H  | 175      | 149       | 26        | 0.152  | FALSE | FALSE | 0              | PASS   |
| A6        | DCAF8L1   | chrX:27999212:T>A   | exonic    | nonsynonymous_snv | E80D   | 457      | 372       | 85        | 0.187  | FALSE | FALSE | 0              | PASS   |
| A6        | DECR1     | chr8:91049143:A>G   | exonic    | nonsynonymous_snv | K205E  | 58       | 49        | 9         | 0.166  | FALSE | FALSE | 0              | PASS   |
| A6        | DIRAS3    | chr1:68512702:C>G   | exonic    | nonsynonymous_snv | K93N   | 179      | 152       | 27        | 0.154  | FALSE | FALSE | 0              | PASS   |
| A6        | DLC1      | chr8:13356569:G>A   | exonic    | nonsynonymous_snv | R338C  | 89       | 79        | 10        | 0.12   | TRUE  | TRUE  | 2              | PASS   |
| A6        | DNA2      | chr10:70192032:G>T  | exonic    | nonsynonymous_snv | Q602K  | 89       | 78        | 11        | 0.131  | FALSE | FALSE | 0              | PASS   |
| A6        | DNAH3     | chr16:21069431:T>A  | exonic    | nonsynonymous_snv | Q1300H | 53       | 46        | 7         | 0.145  | FALSE | FALSE | 0              | PASS   |
| A6        | DNAH6     | chr2:85035598:C>A   | exonic    | nonsynonymous_snv | L3891M | 81       | 73        | 8         | 0.108  | FALSE | FALSE | 0              | PASS   |
| A6        | DUSP27    | chr1:167095602:G>A  | exonic    | nonsynonymous_snv | G412R  | 199      | 141       | 58        | 0.294  | FALSE | FALSE | 0              | PASS   |
| A6        | DYNC111   | chr7:95614255:G>C   | exonic    | nonsynonymous_snv | D254H  | 102      | 61        | 41        | 0.404  | FALSE | FALSE | 0              | PASS   |
| A6        | EDNRB     | chr13:78493532:C>A  | exonic    | nonsynonymous_snv | E73D   | 157      | 118       | 39        | 0.252  | FALSE | FALSE | 0              | PASS   |
| A6        | EHMT1     | chr9:140708956:A>T  | exonic    | nonsynonymous_snv | D1085V | 346      | 276       | 70        | 0.203  | FALSE | FALSE | 0              | PASS   |
| A6        | EMD       | chrX:153609138:C>T  | exonic    | nonsynonymous_snv | S142F  | 295      | 235       | 60        | 0.205  | FALSE | FALSE | 0              | PASS   |
| A6        | ERICH3    | chr1:75065441:C>T   | exonic    | nonsynonymous_snv | R555H  | 67       | 58        | 9         | 0.1343 | TRUE  | TRUE  | 1              | PASS   |
| A6        | FAM181B   | chr11:82443751:G>A  | exonic    | nonsynonymous_snv | R341C  | 348      | 308       | 40        | 0.117  | FALSE | FALSE | 0              | PASS   |
| A6        | FAT2      | chr5:150886965:C>A  | exonic    | nonsynonymous_snv | R4089S | 192      | 142       | 50        | 0.263  | FALSE | FALSE | 0              | PASS   |
| A6        | FAT3      | chr11:92086057:A>G  | exonic    | nonsynonymous_snv | N260S  | 130      | 118       | 12        | 0.097  | FALSE | FALSE | 0              | PASS   |
| A6        | FBXO4     | chr5:41927145:C>G   | exonic    | nonsynonymous_snv | L74V   | 130      | 116       | 14        | 0.113  | FALSE | FALSE | 0              | PASS   |
| A6        | FGD1      | chrX:54472725:G>T   | exonic    | nonsynonymous_snv | F901L  | 527      | 481       | 46        | 0.087  | FALSE | FALSE | 0              | PASS   |
| A6        | FGFR2     | chr10:123324084:G>A | exonic    | nonsynonymous_snv | S129L  | 70       | 56        | 14        | 0.207  | FALSE | FALSE | 0              | PASS   |
| A6        | FICD      | chr12:108913075:C>A | exonic    | nonsense          | Y400X  | 249      | 207       | 42        | 0.171  | FALSE | FALSE | 0              | PASS   |
| A6        | FIG4      | chr6:110064446:C>T  | exonic    | nonsynonymous_snv | S337L  | 51       | 44        | 7         | 0.15   | FALSE | FALSE | 0              | PASS   |
| A6        | FLT4      | chr5:180041175:C>T  | exonic    | nonsynonymous_snv | R1075Q | 682      | 543       | 139       | 0.204  | FALSE | FALSE | 2              | PASS   |
| A6        | FPR1      | chr19:52249356:G>T  | exonic    | nonsynonymous_snv | P298T  | 235      | 177       | 58        | 0.249  | FALSE | FALSE | 0              | PASS   |
| A6        | FREM1     | chr9:14859371:G>C   | exonic    | nonsynonymous_snv | F147L  | 184      | 156       | 28        | 0.156  | TRUE  | TRUE  | 0              | PASS   |
| A6        | FRK       | chr6:116325135:G>C  | exonic    | nonsense          | S124X  | 69       | 57        | 12        | 0.181  | FALSE | FALSE | 0              | PASS   |
| A6        | GALNT13   | chr2:154996951:C>T  | exonic    | nonsense          | Q82X   | 82       | 59        | 23        | 0.285  | FALSE | FALSE | 0              | PASS   |
| A6        | GLB1L     | chr2:220107905:C>G  | exonic    | nonsynonymous_snv | L68F   | 193      | 158       | 35        | 0.184  | FALSE | FALSE | 0              | PASS   |
| A6        | GNA12     | chr7:2883750:C>T    | exonic    | nonsynonymous_snv | E16K   | 40       | 24        | 16        | 0.405  | FALSE | FALSE | 0              | PASS   |
| A6        | GOLGA6L2  | chr15:23686407:C>A  | exonic    | nonsynonymous_snv | R405S  | 737      | 644       | 93        | 0.127  | FALSE | FALSE | 0              | PASS   |



|    |                      |                     |          |                   |         |     |     |     |       |       |       |    |      |
|----|----------------------|---------------------|----------|-------------------|---------|-----|-----|-----|-------|-------|-------|----|------|
| A6 | RP11-321N4.5         | chr6:86322638:C>A   | splicing | splice            | G85G    | 68  | 57  | 11  | 0.162 | FALSE | FALSE | 0  | PASS |
| A6 | RP11-399J13.3        | chr11:64785853:G>A  | exonic   | nonsynonymous_snv | G28E    | 324 | 271 | 53  | 0.164 | FALSE | FALSE | 0  | PASS |
| A6 | RTC8                 | chr22:32792234:C>T  | exonic   | nonsynonymous_snv | A273T   | 77  | 65  | 12  | 0.164 | FALSE | FALSE | 0  | PASS |
| A6 | RTP2                 | chr3:187416515:T>C  | exonic   | nonsynonymous_snv | H150R   | 883 | 685 | 198 | 0.225 | FALSE | FALSE | 0  | PASS |
| A6 | SACS                 | chr13:23911873:C>T  | exonic   | nonsynonymous_snv | E2048K  | 107 | 92  | 15  | 0.146 | FALSE | FALSE | 1  | PASS |
| A6 | SC5D                 | chr11:121177887:T>C | exonic   | nonsynonymous_snv | L189S   | 116 | 102 | 14  | 0.126 | TRUE  | TRUE  | 0  | PASS |
| A6 | SHISA8               | chr22:42306502:C>A  | exonic   | nonsynonymous_snv | G241C   | 530 | 461 | 69  | 0.131 | FALSE | FALSE | 0  | PASS |
| A6 | SLC10A2              | chr13:103703691:A>T | exonic   | nonsynonymous_snv | L226Q   | 132 | 83  | 49  | 0.373 | TRUE  | TRUE  | 0  | PASS |
| A6 | SLC12A8              | chr3:124854600:C>A  | exonic   | nonsense          | E217X   | 192 | 143 | 49  | 0.257 | TRUE  | TRUE  | 0  | PASS |
| A6 | SLC14A1              | chr18:43319130:G>T  | exonic   | nonsynonymous_snv | L222F   | 93  | 67  | 26  | 0.284 | FALSE | FALSE | 0  | PASS |
| A6 | SLC16A2              | chrX:73740853:G>C   | exonic   | nonsynonymous_snv | M153I   | 188 | 141 | 47  | 0.252 | FALSE | FALSE | 0  | PASS |
| A6 | SLC2A13              | chr12:40441855:C>G  | exonic   | nonsynonymous_snv | W238C   | 74  | 64  | 10  | 0.143 | FALSE | FALSE | 1  | PASS |
| A6 | SLC40A1              | chr2:190428865:T>A  | exonic   | nonsynonymous_snv | T283S   | 198 | 179 | 19  | 0.099 | FALSE | FALSE | 0  | PASS |
| A6 | SLC4A10              | chr2:162627561:G>C  | exonic   | nonsynonymous_snv | E54Q    | 35  | 29  | 6   | 0.188 | FALSE | FALSE | 0  | PASS |
| A6 | SLCSA7               | chr2:108627285:G>C  | exonic   | nonsynonymous_snv | E571Q   | 61  | 49  | 12  | 0.206 | FALSE | FALSE | 0  | PASS |
| A6 | SORCS1               | chr10:108536359:T>C | exonic   | nonsynonymous_snv | Y273C   | 66  | 59  | 7   | 0.118 | TRUE  | TRUE  | 0  | PASS |
| A6 | SPANXN1              | chrX:144337210:G>C  | exonic   | nonsynonymous_snv | R32T    | 131 | 107 | 24  | 0.187 | FALSE | FALSE | 0  | PASS |
| A6 | SPEN                 | chr1:16260921:C>T   | exonic   | nonsynonymous_snv | A2729V  | 209 | 174 | 35  | 0.17  | TRUE  | TRUE  | 0  | PASS |
| A6 | SRRM1                | chr1:24981357:C>T   | exonic   | nonsynonymous_snv | S351L   | 89  | 81  | 8   | 0.098 | FALSE | FALSE | 2  | PASS |
| A6 | ST3GAL4              | chr11:126277484:G>T | exonic   | nonsynonymous_snv | R120L   | 398 | 356 | 42  | 0.106 | FALSE | FALSE | 0  | PASS |
| A6 | SUGP1                | chr19:19389597:C>T  | exonic   | nonsynonymous_snv | E513K   | 215 | 175 | 40  | 0.189 | FALSE | FALSE | 0  | PASS |
| A6 | SYNCRIP              | chr6:86322638:C>A   | exonic   | nonsense          | G551X   | 68  | 57  | 11  | 0.17  | FALSE | FALSE | 0  | PASS |
| A6 | SYNE1                | chr6:152675975:T>C  | exonic   | nonsynonymous_snv | Y3582C  | 126 | 111 | 15  | 0.125 | FALSE | FALSE | 0  | PASS |
| A6 | TACR3                | chr4:104512737:C>A  | exonic   | nonsynonymous_snv | W331L   | 82  | 66  | 16  | 0.202 | FALSE | FALSE | 0  | PASS |
| A6 | TAS2R13              | chr12:11061142:C>G  | exonic   | nonsynonymous_snv | W252C   | 100 | 68  | 32  | 0.323 | FALSE | FALSE | 0  | PASS |
| A6 | TBC1D23              | chr3:100038044:C>T  | exonic   | nonsynonymous_snv | P607S   | 115 | 104 | 11  | 0.099 | FALSE | FALSE | 0  | PASS |
| A6 | TBX1                 | chr22:19753930:G>T  | exonic   | nonsynonymous_snv | R343L   | 297 | 254 | 43  | 0.147 | FALSE | FALSE | 0  | PASS |
| A6 | TECTA                | chr11:121028698:C>T | exonic   | nonsynonymous_snv | S1485F  | 359 | 288 | 71  | 0.199 | FALSE | FALSE | 1  | PASS |
| A6 | TMEM200C             | chr18:5890672:T>A   | exonic   | nonsynonymous_snv | Y464F   | 428 | 274 | 154 | 0.361 | FALSE | FALSE | 0  | PASS |
| A6 | TMEM239              | chr20:2795930:C>A   | exonic   | nonsynonymous_snv | R34S    | 502 | 424 | 78  | 0.156 | FALSE | FALSE | 0  | PASS |
| A6 | TP53                 | chr17:7577082:C>A   | exonic   | nonsense          | E247X   | 109 | 90  | 19  | 0.18  | FALSE | FALSE | 37 | PASS |
| A6 | TPO                  | chr2:1499952:G>A    | exonic   | nonsynonymous_snv | R733K   | 542 | 493 | 49  | 0.091 | FALSE | FALSE | 0  | PASS |
| A6 | TRPM8                | chr2:234839319:G>A  | exonic   | nonsynonymous_snv | V42M    | 44  | 32  | 12  | 0.281 | FALSE | FALSE | 0  | PASS |
| A6 | TRRAP                | chr7:98602936:G>A   | exonic   | nonsynonymous_snv | R359K   | 450 | 378 | 72  | 0.16  | FALSE | FALSE | 0  | PASS |
| A6 | TTN                  | chr2:179456135:G>T  | exonic   | nonsynonymous_snv | P20106H | 125 | 94  | 31  | 0.252 | FALSE | FALSE | 1  | PASS |
| A6 | TUBGCP6              | chr22:50659585:G>A  | exonic   | nonsynonymous_snv | S1068L  | 696 | 590 | 106 | 0.153 | FALSE | FALSE | 0  | PASS |
| A6 | URAD                 | chr13:28552584:C>A  | exonic   | nonsense          | E61X    | 148 | 121 | 27  | 0.186 | FALSE | FALSE | 0  | PASS |
| A6 | USH2A                | chr1:216595521:G>T  | exonic   | nonsynonymous_snv | P53Q    | 141 | 114 | 27  | 0.194 | FALSE | FALSE | 0  | PASS |
| A6 | UTP20                | chr12:101767513:G>C | exonic   | nonsynonymous_snv | D2367H  | 138 | 124 | 14  | 0.106 | TRUE  | TRUE  | 0  | PASS |
| A6 | VAX1                 | chr10:118896040:G>T | exonic   | nonsense          | Y124X   | 465 | 377 | 88  | 0.19  | TRUE  | TRUE  | 0  | PASS |
| A6 | VMA21                | chrX:150565812:C>T  | exonic   | nonsynonymous_snv | A11V    | 264 | 223 | 41  | 0.157 | FALSE | FALSE | 0  | PASS |
| A6 | VPS13C               | chr15:62170909:C>T  | exonic   | nonsynonymous_snv | E3347K  | 40  | 27  | 13  | 0.332 | TRUE  | FALSE | 0  | PASS |
| A6 | VWA5A                | chr11:123988993:G>T | exonic   | nonsynonymous_snv | G115V   | 128 | 97  | 31  | 0.246 | TRUE  | TRUE  | 0  | PASS |
| A6 | WDR24                | chr16:735301:C>A    | exonic   | nonsynonymous_snv | V659F   | 884 | 695 | 189 | 0.214 | FALSE | FALSE | 0  | PASS |
| A6 | XIRP2                | chr2:167992549:G>T  | exonic   | nonsynonymous_snv | S180I   | 64  | 53  | 11  | 0.181 | FALSE | FALSE | 0  | PASS |
| A6 | XKR7                 | chr20:30584398:C>A  | exonic   | nonsynonymous_snv | P293Q   | 660 | 564 | 96  | 0.146 | FALSE | FALSE | 0  | PASS |
| A6 | YJEFN3               | chr19:19640173:G>T  | exonic   | nonsynonymous_snv | R20S    | 707 | 577 | 130 | 0.184 | FALSE | FALSE | 0  | PASS |
| A6 | ZIC1                 | chr3:147131169:A>T  | exonic   | nonsynonymous_snv | Q392L   | 297 | 234 | 63  | 0.213 | FALSE | FALSE | 0  | PASS |
| A6 | ZNF197               | chr3:44671013:G>C   | exonic   | nonsynonymous_snv | D123H   | 139 | 106 | 33  | 0.237 | FALSE | FALSE | 0  | PASS |
| A6 | ZNF197;ZNF660-ZNF197 | chr3:44671013:G>C   | exonic   | nonsynonymous_snv | D123H   | 138 | 105 | 33  | 0.242 | FALSE | FALSE | 0  | PASS |
| A6 | ZNF367               | chr9:99180195:G>C   | exonic   | nonsynonymous_snv | I40M    | 298 | 241 | 57  | 0.193 | FALSE | FALSE | 0  | PASS |
| A6 | ZNF383               | chr19:3726574:A>G   | exonic   | nonsynonymous_snv | M45V    | 162 | 89  | 73  | 0.451 | TRUE  | TRUE  | 0  | PASS |
| A6 | ZNF41                | chrX:47307429:T>A   | exonic   | nonsynonymous_snv | E580D   | 99  | 85  | 14  | 0.148 | FALSE | FALSE | 0  | PASS |
| A6 | ZNF768               | chr16:30536686:G>A  | exonic   | nonsynonymous_snv | R259W   | 327 | 286 | 41  | 0.127 | FALSE | FALSE | 1  | PASS |

Exome-seq result of the resected tumor from Stanford NSCLC patient A6.
